1 **An amphioxus neurula stage cell atlas supports a complex scenario for the**  
2 **emergence of vertebrate head mesoderm**

3

4

5 Xavier Grau-Bové<sup>1,2,\*</sup>, Lucie Subirana<sup>3,\*</sup>, Lydvina Meister<sup>3</sup>, Anaël Soubigou<sup>3</sup>, Ana Neto<sup>4</sup>,  
6 Anamaria Elek<sup>1,2</sup>, Oscar Fornas<sup>5,6</sup>, Jose Luis Gomez-Skarmeta<sup>4</sup>, Juan J. Tena<sup>4</sup>, Manuel  
7 Irimia<sup>1,2,7</sup>, Stéphanie Bertrand<sup>3,#</sup>, Arnau Sebé-Pedrós<sup>1,2,7,#</sup>, Hector Escriva<sup>3,#</sup>

8

9 1. Centre for Genomic Regulation (CRG), Barcelona Institute of Science and Technology (BIST),  
10 Barcelona, Spain.

11 2. Universitat Pompeu Fabra (UPF), Barcelona, Spain.

12 3. Sorbonne Université, CNRS, Biologie Intégrative des Organismes Marins, BIOM, F-66650,  
13 Banyuls-sur-Mer, France.

14 4. Centro Andaluz de Biología del Desarrollo (CABD), CSIC-Universidad Pablo de Olavide-Junta de  
15 Andalucía, Sevilla, Spain

16 5. Flow Cytometry Unit, Centre for Genomic Regulation (CRG), The Barcelona Institute for Science  
17 and Technology (BIST), Barcelona, Spain.

18 6. Departament de Ciències Experimentals i de la Salut, Universitat Pompeu Fabra (UPF), Barcelona,  
19 Spain.

20 7. ICREA, Barcelona, Spain.

21 \*Contributed equally

22 #Corresponding author

23

24 **Abstract**

25 The emergence of new structures can often be linked to the evolution of novel cell types that  
26 follows the rewiring of developmental gene regulatory subnetworks. Vertebrates are  
27 characterized by a complex body plan compared to the other chordate clades and the question  
28 remains of whether and how the emergence of vertebrate morphological innovations can be  
29 related to the appearance of new embryonic cell populations. We already proposed, by  
30 studying mesoderm development in the cephalochordate amphioxus, a scenario for the  
31 evolution of the vertebrate head mesoderm. To further test this scenario at the cell population  
32 level, we used scRNA-seq to construct a cell atlas of the amphioxus neurula, stage at which  
33 the main mesodermal compartments are specified. Our data allowed us to confirm the  
34 presence of a prechordal-plate like territory in amphioxus, and shows that cell populations of  
35 the anteriormost somites and of the ventral part of the somites present a transcriptomic profile  
36 supporting the homology with vertebrate cranial/pharyngeal and lateral plate mesoderm.  
37 Finally, our work provides evidence that the appearance of the specific mesodermal structures  
38 of the vertebrate head was associated to both segregation of pre-existing cell populations, and  
39 co-option of new genes for the control of myogenesis.

40

41

42

## 43 **Main text**

### 44 **Introduction**

45 Chordates are an animal clade characterized by the presence of a notochord (in at least one  
46 stage of their life cycle)<sup>1</sup> and that include vertebrates, tunicates (or urochordates), and  
47 cephalochordates (*i.e.* amphioxus). Even if tunicates are phylogenetically more closely related  
48 to vertebrates<sup>2</sup> and share with them some morphological features absent in amphioxus<sup>3</sup>, they  
49 show developmental modalities and a genomic content and organization that have diverged  
50 considerably from the chordate ancestral state<sup>4</sup>. On the other hand, amphioxus exhibit  
51 relatively conserved morphological, developmental, and genomic characteristics, and  
52 represent a model of choice for studying chordate evolution and the emergence of vertebrate  
53 novelties<sup>5,6</sup>.

54         The gastrula of cephalochordates has two germ layers: the ectoderm, which forms the  
55 epidermis and the central nervous system, and the internal mesendoderm, which develops into  
56 mesodermal structures in the dorsal part, and into endodermal structures in the ventral region<sup>7</sup>.  
57 Unlike vertebrates, the mesoderm is first simply divided during neurulation into the axial  
58 territory forming the notochord, and the paraxial domain that becomes completely segmented  
59 into somites from the most anterior to the posterior part of the embryo. In vertebrates, in  
60 addition to the notochord and somites, the mesoderm is subdivided into other territories: the  
61 lateral plate mesoderm in the trunk that forms several structures among which part of the heart  
62 and circulatory system, blood cells, fin buds or excretory organs<sup>8</sup>; and the prechordal plate  
63 (axial) and cranial/pharyngeal (paraxial, unsegmented) mesoderm in the anterior region that  
64 form head muscles and part of the heart<sup>9,10</sup>. If we consider that the amphioxus mesoderm  
65 organization could resemble that of the chordate ancestor, these mesodermal territories  
66 represent vertebrate specific traits that contributed to the acquisition of particular structures,  
67 including the complex vertebrate head.

68         Based on previous work, we have proposed a multi-step scenario for the evolution of  
69 the vertebrate anterior mesoderm<sup>11,12</sup>. The first step consists in the segregation of the ventral  
70 mesoderm from the paraxial mesoderm and loss of its segmentation. This implies that the  
71 ventral part of amphioxus somites is homologous to the vertebrate lateral plate mesoderm.  
72 The second step corresponds to the loss of the paraxial mesoderm in the anterior part of the  
73 embryo. This would have enabled the relaxation of the developmental constraints imposed by  
74 the anterior somites, and the remodelling of the axial and lateral plate mesoderm resulting in  
75 the appearance of the prechordal plate and cranial/pharyngeal mesoderm. This would mean

76 that i) the cranial/pharyngeal mesoderm has a lateral rather than paraxial origin, and partly  
77 shares a common developmental program with the amphioxus anterior somites and ventral  
78 part of posterior somites, and ii) the prechordal plate is in part homologous to the amphioxus  
79 anterior notochord.

80 Here we sought to explore the evolutionary origin of the vertebrate head mesoderm  
81 from a cell type perspective. In order to compare embryonic cell types between amphioxus  
82 and vertebrates, we conducted a scRNA-seq analysis of the *Branchiostoma lanceolatum*  
83 neurula (N3)<sup>13,14</sup>. The neurula stage shows the highest global transcriptional similarity with  
84 vertebrates<sup>15</sup>, corresponding to the chordate phylotypic stage<sup>16</sup>, and our cell atlas uncovers  
85 the gene expression signatures of most of the previously described embryonic territories at  
86 this stage. Concerning the mesoderm compartment, we found a cell population with a mixed  
87 profile between endoderm and notochord, supporting the existence of a transient prechordal  
88 plate-like structure in amphioxus<sup>12,17</sup>. We also show that the first somite pair cells form a  
89 population with a transcriptomic profile different from the posterior somites, highlighting the  
90 peculiarity of this somitic pair. Moreover, these cells express orthologues of vertebrate genes  
91 expressed in both head and lateral plate mesoderm and their derivatives, bringing further  
92 support to our evolutionary scenario, and suggesting how, from pre-existing cell populations,  
93 new embryonic territories might have emerged in vertebrate anterior mesoderm. Finally, the  
94 functional study in transgenic zebrafish lines of regulatory regions of *Gata1/2/3*, *Tbx1/10* and  
95 *Pitx* also supports the lateral origin of the cranial/pharyngeal mesoderm and gives insights  
96 into how genes that were presumably not controlling muscle formation in the chordate  
97 ancestor were co-opted as master genes of the myogenesis program in the vertebrate head.

98

## 99 **Results and discussion**

### 100 *A cell atlas of the amphioxus neurula stage embryo*

101 To build a transcriptional cell atlas of the amphioxus neurula stage (N3), we applied MARS-  
102 seq<sup>18</sup> to embryos at 21 hpf (hours post-fertilization, at 19°C) (**Fig. 1a**). Briefly, cells were  
103 dissociated and alive single cells (calcein positive, propidium-iodide negative) were sorted  
104 into 384-well plates, followed by scRNA-seq library preparation. At this developmental stage,  
105 the embryo is made of around 3,000 cells and we sampled in total 14,586 single-cell  
106 transcriptomes, representing approximately a five-fold coverage. These cells were grouped  
107 into 176 transcriptionally coherent clusters (referred to as “metacells”<sup>19</sup>) (**Fig. 1b**,  
108 **Supplementary Fig. 1a**). Metacells were further assigned to a tissue/cell type by using  
109 transcriptional signatures of known marker genes: epidermis, endoderm, mesoderm, muscular  
110 somite and neural (**Fig. 1c**). The proportion of cells assigned to each structure/germ layer was  
111 overall consistent with cell counting in 3D embryos reconstructed using confocal imaging of  
112 labelled nuclei followed by image segmentation, with more than half of the cells belonging to  
113 the epidermis (**Fig. 1d**).

114 Gene expression signatures across epidermal metacells shows that this tissue is not  
115 homogenous. For example, we recognized anterior epidermal cells (i.e. expressing *Arpd2*,  
116 *Fgf1*, *Fzd5/8*, *Pax4/6*)<sup>20-23</sup>, posterior cells (*Cdx*, *Tbx6/16*, *Wnt3*)<sup>24-26</sup> and subpopulations of  
117 potential epidermal sensory cells (*Delta*, *Elav*, *Tlx*)<sup>27-29</sup>. Among the neural metacells, we  
118 identified several metacells corresponding to the cerebral vesicle (anterior central nervous  
119 system, *Otx*<sup>30</sup>). Concerning the mesodermal cell populations, we could assign several  
120 metacells to the notochord (*Cola*, *Foxaa*, *Mnx*, *Netrin*)<sup>31-34</sup> and tailbud compartments (*Nanos*,  
121 *Piwill*, *Vasa*, *Wnt1*)<sup>26,35,36</sup>. In the endoderm, one metacell could be assigned to the ventral  
122 endodermal region that later develops into the endostyle and the club-shaped gland (*Foxe*,  
123 *Nkx2.5*)<sup>37,38</sup>. We further validated our atlas by analysing by *in situ* hybridisation the  
124 expression of several genes with undescribed patterns, including genes enriched in neural  
125 plate (*Tcf15-like*), endoderm (*PLAC8 motif-containing protein 1*), anterior epidermal (*ST14-*  
126 *like*), cerebral vesicle (*Calcitonin Family Peptide 1 (Ctfp1)*), notochord (*Tenascin*) or tailbud  
127 (*Notum*) populations (**Fig. 1e and Supplementary Fig. 2**). Overall, our single-cell  
128 transcriptomic atlas uncovers the diversity of cell states associated to each major germ layer  
129 in the amphioxus neurula.

130

### 131 *Cross-species comparison of neurula stage embryonic tissues*

132 To gain insights into the evolutionary affinities of amphioxus neurula stage tissues, we  
133 compared aggregated expression profiles of the different structures and tissues with those of  
134 three other chordates, using published developmental single-cell atlases for *Ciona*  
135 *intestinalis*<sup>39</sup>, *Xenopus laevis*<sup>40</sup> and *Danio rerio*<sup>41</sup> (**Fig. 2a**). We focused our comparative  
136 analysis on stages approximately corresponding to the amphioxus neurula stage<sup>15</sup> and used  
137 single-cell expression profiles similarly grouped into embryonic tissues.

138 In all three pairwise comparisons, the notochord showed the strongest transcriptional  
139 similarity and shared expression of the TFs *Brachyury2* (*T*), *Foxaa* and *Foxab* (*Foxa1* and  
140 *Foxa2*) (**Fig. 2b**). Likewise, amphioxus differentiated muscular somites resemble  
141 muscle/skeletal muscle in tunicates and both vertebrates (**Fig. 2a**), albeit with different sets of  
142 TFs between species (**Fig. 2b**). In contrast, the non-muscular part of amphioxus somites  
143 resembles vertebrate presomitic mesoderm and shares expression of the TFs *Foxc* (*Foxc2*),  
144 *Snail* (*Snai2*) and *Hox3* (*Hoxa3*) (**Fig. 2b**). Amphioxus neural cells also resemble vertebrate  
145 neural populations and co-express neural TFs like *Sox1c* (*Sox2*), *Soxc* (*Sox4*) and  
146 *Neurogenin* (*Neurog3*). These same TFs are also shared by tunicate neural cells, but the  
147 overall transcriptome does not show similarity with amphioxus neurons. The opposite is true  
148 for the endodermal transcriptome: amphioxus endoderm transcriptome matches that of  
149 tunicates, but not vertebrate endoderm, although the TFs *Foxaa* and *Foxab* (*Foxa1* and  
150 *Foxa2*) are expressed in all of them (**Fig. 2b**). Finally, the amphioxus anterior epidermis looks  
151 more distinct than the posterior one. Among vertebrate epidermal cells, its most similar pairs  
152 are secretory cells both in *Danio* and *Xenopus* (termed “Goblet cells” there). But it also hits  
153 different mesodermal tissues in *Danio* (e.g. the endothelium). On the other hand, the  
154 amphioxus posterior epidermis is broadly similar to many epidermal cell types of the two  
155 vertebrates, most notably the epidermal progenitors and ionocytes.

156 When examining the lists of shared markers between transcriptionally similar  
157 embryonic tissues/cell types (**Supplementary Table 1**), we observed a general  
158 overrepresentation of transcription factors (TFs) and chromatin factors compared with  
159 effector genes, as expected when comparing undifferentiated cell populations.

160

### 161 *The accessible chromatin landscape of amphioxus neurula stage*

162 To interrogate the regulatory logic underlying the observed cell-specific transcriptomes, we  
163 performed bulk ATAC-seq experiments in neurula stage embryos. We defined a total of  
164 51,028 ATAC-seq peaks and assigned them by proximity to 19,069 genes (median 2,05 peaks  
165 per expressed gene) (**Supplementary Fig. 1b-i**). We then grouped these peaks according to

166 the expression pattern of the associated genes and conducted motif enrichment analysis on  
167 these regulatory element groups, using a combination of *de novo* inferred and known motifs  
168 (see Methods). This analysis revealed 317 distinct motifs with significant enrichments in  
169 specific cell populations (**Fig. 3a**).

170 The identified motifs are consistent with known TF regulators in amphioxus and other  
171 metazoans and, in addition, motif enrichments often parallel the expression of the associated  
172 TFs (**Fig. 3b, Supplementary Fig. 3**). For example, in peaks assigned to epidermal genes, we  
173 found enrichment for motifs like *Dlx*, *Grhl*, *Klf1/2/4*, *Rfx1/2/3* or *Tfap2*, coincident with the  
174 expression of *Dlx*, *Klf1/2/4* and *Tfap2* in epidermal metacells (**Fig. 3b**). Interestingly, these  
175 TFs are part of the *in silico* reconstructed gene regulatory network controlling epidermis  
176 development described in amphioxus<sup>42</sup> and are known epidermal fate determinants in  
177 vertebrates<sup>43-46</sup> (**Fig. 2b**).

178 In endodermal cells, we found a slight but non-significant enrichment of a Fox motif  
179 in the regulatory regions of endodermal marker genes, possibly linked to the expression of  
180 *Foxaa* and *Foxab* in these tissues (**Supplementary Fig. 3**). Furthermore, in the endoderm and  
181 the endostyle, we also observed the coincident expression/motif enrichment of *Gsc* and *Nkx2-*  
182 *5/6*, respectively (**Fig. 3b**).

183 Neural cell types exhibited expression of various Sox and Pou family TFs and  
184 concomitant enrichment of their associated motifs, including *Soxc* (*Sox4*) and *Soxb2* (*Sox14*)  
185 in multiple neural tissues, the hypothalamus-specific expression/enrichment of *Soxb1c* (*Sox2*),  
186 and *Pou3fl* (*Pou3f4*) in the Di-Mesencephalic primordium<sup>20</sup> and neural tailbud cells (**Fig. 3b**).  
187 The neural specificities of these TFs appear to be conserved across vertebrates (**Fig. 2b**) and  
188 SoxB1 and Pou3f family factors have been proposed as potential major regulators of nervous  
189 system development in amphioxus<sup>42</sup>. The activity of *Pou3fl* (*Pou3f4*) in neural tailbud cells is  
190 also consistent with the function of TFs from these families in stemness maintaining in  
191 vertebrates<sup>47</sup>. This is also the case for the *Myc/Max* HLHs in the non-neural tailbud  
192 population, as observed in mouse<sup>48</sup>.

193 The peaks associated to genes overexpressed in non-muscular somite cell populations  
194 are enriched in T-box motifs, consistently with the expression in our dataset of various TFs of  
195 this family such as *Eomes/Tbr1/Tbx21*, *Tbx15/18/22*, and *Brachyury2* (**Fig. 3b**) and with  
196 previously reported expression of these genes in forming somites<sup>49-51</sup>. The muscular somite  
197 population peaks are enriched in motifs shared with the non-muscular somite, but are also  
198 enriched in motifs for Myogenic Regulatory Factors (MRF) such as *Mrf4* (*Myf6*), which is  
199 also highly expressed in this cell type (**Fig. 3b**), in line with both the expression of the various

200 amphioxus MRFs described by *in situ* hybridization<sup>52</sup>, and the role of their orthologues in  
201 vertebrate myogenesis<sup>53</sup>. The strongest TF-motif association concerns the previously reported  
202 notochordal marker *Foxaa* (*Foxa2*) (**Fig. 3b**)<sup>34</sup>, which is also shared with tunicates and  
203 vertebrates in our cross-species cell type comparisons (**Fig. 2b**). Overall, the accessible  
204 chromatin landscape of the neurula stage revealed the regulatory motif lexicons underlying  
205 amphioxus embryonic cell identities.

206

### 207 ***Characterization of neural, endodermal and somitic cell populations***

208 We then focused on the detailed analysis of specific cell populations. To this end, we  
209 performed separate clustering of single cells classified as belonging to the neural tissue (*sensu*  
210 *stricto*, derived from the neural plate), to the endoderm and to the somites (muscular and non-  
211 muscular).

212 Neural plate cells could be clustered into 22 metacells (**Fig. 4a, b, Supplementary**  
213 **Fig. 2 and 4**). Among these, we recognized three metacells corresponding to the cerebral  
214 vesicle (4, 12, and 22). Metacells 4 and 22 coexpress the known marker genes *Arpd2*, *Fezf*,  
215 *Fgfrl*, *Fgf8/17/18*, and *Otx*<sup>20,21,30,54</sup> (**Supplementary Fig. 4**) together with the newly described  
216 genes *Celf3/4/5/6* (**Fig. 4a, b**) and *Ctfp1* (**Fig. 1e, Supplementary Fig. 4**) and correspond to  
217 the Hypothalamo-prethalamic primordium as previously described<sup>20</sup> with metacell 4  
218 overexpressing *Six3/6*<sup>20</sup> (**Supplementary Fig. 4**) and hence representing its rostral part. On  
219 the other hand, metacell 12 shows expression of *Otx* and *Pax4/6*, a combination typical of the  
220 Di-Mesencephalic primordium<sup>20</sup> (**Supplementary Fig. 4**). Metacells 20 and 21 co-express the  
221 posterior gene markers *Cdx*, *Nanos*, *Vasa* and *Wnt1*<sup>25,35,55</sup> (**Supplementary Fig. 4**), together  
222 with *Bolla*, *Otp* and *Zf-Ring Protein* described here (**Fig. 4a, b, Supplementary Figure 2 and**  
223 **4**), suggesting that these metacells represent the posterior-most neural plate. In addition to  
224 expressing posterior markers, metacell 9 also expresses *Netrin* that marks the floorplate<sup>33</sup>  
225 (**Supplementary Fig. 4**). According to the expression of the floor plate marker genes  
226 *Chordin*, *Foxaa*, *Goosecoid*, *Netrin*, *Nkx2.1* and *Nkx6*<sup>20,26,33,34,56-59</sup> (**Supplementary Fig. 4**),  
227 metacells 8 and 14 could be assigned to this structure, with metacell 8 additionally expressing  
228 the posterior genes *Cdx* and *Hox3*<sup>20,25,60</sup> (**Supplementary Fig. 4**). The expression of *Msx*,  
229 *Pax3/7* and *Snail*<sup>20,61-63</sup> in metacells 11 and 13 indicate they belong to the neural plate border  
230 with metacell 13 expressing the anterior marker *Gremlin*<sup>64</sup>, and metacell 11 expressing the  
231 posterior gene *Hox3*<sup>20,60</sup> (**Supplementary Fig. 4a**). We could also recognize metacells 2, 7  
232 and 10 as segmentally arranged neurons co-expressing *Islet*<sup>65</sup> (**Supplementary Fig. 4**) and  
233 *Nhlh1/2* (**Fig. 4a,b**), with metacell 10 corresponding to a specific pair of neurons



234 characterized by *Celf3/4/5/6* and *Igfbp* expression (**Fig. 4a,b**). All the other metacells show  
235 few specific markers and could represent differentiating cells. These cells express different  
236 combinations of the known neural genes *Elav*<sup>27</sup> and *Neurogenin*<sup>66</sup>, together with *Hey-related*  
237 (**Fig. 4b**), *Prox* (**Supplementary Fig. 2, 4**) and *Tcf15-like* genes (**Fig. 1e, Supplementary**  
238 **Fig. 4**).

239 Concerning the endodermal compartment, we could recognize metacells  
240 corresponding to the main known territories (**Fig. 4c, d and Supplementary Fig. 2 and 5**).  
241 The expression of the ventral marker *Nkx2.1*<sup>67</sup>, together with anteriorly expressed genes such  
242 as *Dmbx*, *Fgfr1*, *Fzd5/8* and *Sfrp1/2/5*<sup>20,21,23,59,68,69</sup> (**Supplementary Fig. 5**) indicates that  
243 metacell 2 corresponds to the ventral anterior endoderm territory whereas metacells 3 and 7  
244 show a combination of marker genes that are typical of the ventral endoderm that later  
245 develops into the club-shaped gland and the endostyle such as *Foxe*, *Nkx2.5*, *Tbx1/10* and  
246 *Pax1/9*<sup>37,38,70,71</sup> (**Fig. 4c, d and Supplementary Fig. 5**). The expression of *Pitx* in metacell 3  
247 suggests that metacells 3 and 7 correspond to the left and right part of this territory,  
248 respectively<sup>72</sup>. Posterior to that, metacells 16 and 17 that are characterized by low or no  
249 expression of *Soxf* correspond to the first pharyngeal slit anlagen<sup>73</sup> while metacell 14  
250 expresses both *Irx* and *Foxaa*, a combination specifically observed in a region that is just  
251 behind it<sup>34,74</sup> (**Fig. 4c, d and Supplementary Fig. 5**). Metacells 5 and 11 express *Pax1/9* but  
252 no ventral markers and could correspond to the dorsal mid endoderm region<sup>70</sup> (**Fig. 4c,d**).  
253 Metacells 8 and 12 show a very similar profile with an enrichment in transcripts of  
254 mid/posterior endoderm markers such as *Nkx2.2*, *Foxaa*<sup>34,75</sup> (**Supplementary Fig. 5**), and the  
255 newly described gene *Fabp3/4/5/7/8/9/11/12* (**Fig. 4c, d**) with metacell 12 additionally  
256 expressing *Gata4/5/6* indicating that the corresponding cells are more ventral than those from  
257 metacell 8<sup>76</sup> (**Supplementary Fig. 5**). Metacell 9 has a transcriptional profile similar to that of  
258 metacells 8 and 12 combining expression of the mid/posterior marker *Foxaa*<sup>34</sup>  
259 (**Supplementary Fig. 5**) and absence of *Pax1/9* expression<sup>70</sup> (**Fig. 4c, d**). The posterior  
260 marker *Wnt8*<sup>55</sup> is expressed in metacells 4 and 6 with metacell 4 also expressing the ventral  
261 marker *Gata4/5/6*<sup>76</sup>, and, hence, representing the ventral posterior territory (**Supplementary**  
262 **Fig. 5**). Finally, metacells 1, 10 and 13 are characterized by an enrichment in anterior markers  
263 *Dmbx*, *Fgfr1*, *Fzd5/8* and *Sfrp1/2/5*<sup>21,23,59,68,69</sup> as well as *Six3/6*, *Six4/5* and *Zic*<sup>77,78</sup> (**Fig. 4c, d**  
264 **and Supplementary Fig. 5**). They show a transcriptional signature of the anterior dorsal  
265 mesendoderm, a region which is continuous with the notochord *per se* posteriorly, and which  
266 is continuous laterally with the endoderm *per se*. Metacell 1 is also expressing the newly  
267 described gene *Thsd7* (**Fig. 4c,d**), together with *Brachyury2*, *Pax3/7* and *Zeb*<sup>42,51,61</sup> and lacks

268 *Nkx2.1* expression<sup>58</sup> (**Supplementary Fig. 5**) suggesting it represents the axial part of this  
269 region, whereas metacells 10 and 13, expressing *Nkx2.1*, would correspond to the paraxial  
270 more ventral portion that latter form the left and right Hatschek's diverticula<sup>58</sup>  
271 (**Supplementary Fig. 5**). Therefore, metacell 1 represents a potential prechordal plate-like  
272 territory showing a transcriptomic profile characterized by anterior and axial markers together  
273 with endodermal markers. Such a territory was already proposed to exist in amphioxus based  
274 on both cell behaviour and gene expression of several marker genes<sup>12,17,79</sup> but our data  
275 highlight the strong difference in its transcriptomic profile compared to the other notochord  
276 cells, reinforcing the idea that ancestral chordates possessed a prechordal plate-like region that  
277 later evolved specific functions in vertebrates.

278 Finally, re-clustering of cells assigned to the somites resulted in 12 metacells (**Fig. 4e,**  
279 **f and Supplementary Fig. 2 and 6**). As expected, we found a population (metacell 8) with a  
280 profile typical of the muscular part of somites that starts to differentiate, characterized by the  
281 expression of *Mef2*, *Lmo4*, several MRFs, together with *MLC-alk*<sup>52,80,81</sup> (**Supplementary Fig.**  
282 **6**) and the newly described gene *Titin-like* (**Supplementary Fig. 2 and 6**). Metacells 7 and 9  
283 have similar profiles and also express *Titin-like* and several MRFs<sup>52</sup> (**Supplementary Fig. 2**  
284 **and 6**) together with *Brachyury2*, *Delta*<sup>29,51</sup> and the newly described gene *Twist-like*  
285 (**Supplementary Fig. 2 and 6**). They hence correspond to the last somites that have just been  
286 formed, with metacell 7 more posterior as indicated by the expression of *Wnt1* or *Wnt4*<sup>55</sup>.  
287 More posteriorly, metacell 5 is characterized by the expression of newly described tailbud  
288 gene markers such as *Bicc*, *Otp*, *SF2 family helicase* (**Fig. 4b, Supplementary Fig. 2 and 6**),  
289 together with *Vasa*, *Nanos* and *Wnt1*, 4 and 6<sup>36,55</sup> but also expresses *Brachyury2* and *Mrf4*, a  
290 combination corresponding to the tailbud somitic part<sup>51,52</sup> (**Supplementary Fig. 6**). Metacells  
291 4 and 6 also express tailbud markers but do not express MRF genes. Moreover, metacell 4 is  
292 characterized by an enrichment in transcripts of the ventral markers *Gata1/2/3* and  
293 *Vent1/Vent2*<sup>76,82,83</sup> (**Fig. 4e, f and Supplementary Fig. 6**). The most important novelty  
294 concerns the first somite pair, which clearly shows a transcriptomic profile divergent from the  
295 other pairs. Metacells 1 and 3 correspond to this first pair, with metacell 1 representing the  
296 right somite, and metacell 3 the left one (**Fig. 4e, f**). Indeed, contrary to metacell 1, cells of  
297 the latter express the left side marker *Pitx*<sup>72</sup> as well as *Gremlin*, which is expressed in the first  
298 left somite at this stage<sup>64</sup> (**Supplementary Fig. 6**). Both metacells express the anterior marker  
299 *Fgfr1*<sup>21</sup> (**Supplementary Fig. 6**), and three newly described markers: *Erg/Fli1a*, *Tcf21/Msc*  
300 and *FReD containing protein* (**Fig. 4e, f**). They also express the ventral somite marker genes  
301 *Alx*, *Gata1/2/3*, *Ripply* and *Vent1/Vent2*<sup>32,76,82-84</sup> (**Fig. 4e, f and Supplementary Fig. 6**). To

302 note, no Wnt genes are expressed in these metacells, whereas the ventral markers are  
303 expressed together with *Wnt16*<sup>55</sup> in metacells 2 and 11 that correspond to the ventral region of  
304 the formed somites posterior the the first pair (**Supplementary Fig. 6**). Interestingly,  
305 *Erg/Flila* is orthologous to *Fli-1* which is implicated in vertebrate hemangioblast  
306 development together with *Vegfr* and *Sc/Tal-1*<sup>85</sup>. The amphioxus orthologues of the latest  
307 were also shown to be expressed in the first somite pair<sup>76</sup>, reinforcing the proposition of  
308 homology between this first pair of somites and the embryonic hematopoietic/angiogenic field  
309 of vertebrates that derives from the lateral plate mesoderm. On the other hand, *Tcf21/Msc*  
310 orthologous to *Tcf21/Capsulin* and *Msc/MyoR* that are main regulators of head muscle  
311 myogenesis in vertebrates, upstream of MRFs<sup>86-88</sup>, suggesting that the first somite pair of  
312 amphioxus has a profile that resembles both vertebrate head and lateral plate mesoderm.

313

#### 314 *The evolution of the chordate anterior mesoderm*

315 The most striking feature of the amphioxus neurula highlighted by our data is the presence of  
316 three cell populations with a peculiar transcriptional profile: cells of the first left and right  
317 somites (metacells 1 and 3, **Fig. 4e, f**), and cells that could correspond to a prechordal plate-  
318 like structure (metacell 1, **Fig. 4c, d**). The first somite pair in amphioxus has long been  
319 proposed as being distinct from the other pairs, and we previously showed that this somite  
320 pair is the only one whose formation is controlled by the FGF signalling pathway<sup>11,12,54</sup>. Our  
321 molecular atlas additionally shows that the cells of the first pair of somites transcriptionally  
322 resemble vertebrate head and lateral plate mesoderm (metacells 1 and 3, **Fig. 4e, f and**  
323 **Supplementary Fig. 5**), while the cells of the ventral part of amphioxus somites posterior to  
324 the first pair express orthologues of genes expressed in vertebrates lateral plate mesoderm or  
325 derivatives (metacells 2 and 11, **Fig. 4e, f and Supplementary Fig. 5**). These data support the  
326 homology we proposed between vertebrate lateral plate mesoderm and amphioxus ventral part  
327 of the somites as well as the ventral origin of vertebrate cranial/pharyngeal mesoderm. Such  
328 proposed homology based on transcriptomic profile should reflect a conserved regulatory  
329 logic. Considering homology at the gene expression regulation level, we reasoned that if our  
330 scenario for vertebrate mesoderm evolution supported by our cell atlas is correct, regulatory  
331 regions of genes that are active at the neurula stage in amphioxus in the ventral region of  
332 somites could drive expression of a reporter gene in the vertebrate lateral plate and head  
333 mesoderm, as a reminiscence of an ancestrally shared regulatory program. Among such genes,  
334 *Gata1/2/3* is the transcription factor with the highest enrichment (fold change) in metacells 2  
335 and 11 of the somite reclustering analysis (**Fig. 4e, f**), which we could assign to the ventral

336 region of the somites. We decided to test whether the regulatory elements controlling the  
337 expression of amphioxus *Gata1/2/3* at this stage are recognized by any tissue/cell type  
338 specific regulatory state in zebrafish, which would point at evolutionary conservation (at least  
339 partially) of *Gata1/2/3* regulation. To this end, we generated transgenic reporter constructs for  
340 four putative regulatory regions selected using ATAC-seq data (**Fig. 5a**). We tested the  
341 heterologous activity of these regions by generating F0 transgenic zebrafish. The transcription  
342 factor binding motif composition of the four tested regions differs completely  
343 (**Supplementary Table 2**), which means that we should expect distinct activities when  
344 separately exposed to zebrafish regulatory states. Only one region was able to drive the  
345 reporter gene expression (*eGFP*) in a restricted manner in F0 embryos and we generated F1  
346 transgenics for the corresponding construct. We observed green fluorescence in the head  
347 mesoderm at 24 hpf and in both the pectoral fin buds and the head mesoderm at 48 hpf (**Fig.**  
348 **5b**). The genomic sequence cloned in this reporter assay contains motifs for *Alx* and *Foxc1*  
349 (**Fig. 5a, Supplementary Table 2**) and both *Alx1* and *Foxc1a* are expressed in the head  
350 mesoderm of zebrafish<sup>89-91</sup>. It also contains motifs for *Prrx1* (**Fig. 5a, Supplementary Table**  
351 **2**), with *Prrx1a* and *Prrx1b* being expressed in the zebrafish head mesoderm, branchial arches  
352 and pectoral fin buds<sup>92</sup>, suggesting that part of the factors that control gene expression of  
353 *Gata1/2/3* in the ventral part of amphioxus somites also regulate the expression of genes in  
354 both the head and lateral plate mesoderm in vertebrates.

355 In vertebrates, both the anterior axial (prechordal plate) and pharyngeal/cranial  
356 mesoderm structures develop into different muscle populations: the extraocular muscles, and  
357 several facial/branchial muscles, respectively<sup>10</sup>. Interestingly, myogenesis in these cells,  
358 although it is mediated by the activity of members of the MRF family, is controlled by the  
359 upstream factors *Pitx2* (extraocular muscles) and *Tbx1* (pharyngeal muscles) and not by  
360 *Pax3/7* and *Six1/2* factors as it is the case for muscles deriving from the somites<sup>10,88,93</sup>. In  
361 amphioxus, we previously showed that all the somites form under the control of *Pax3/7*,  
362 *Six1/2* and/or *Zic11*. Moreover, *Pitx*, the ohnologue of vertebrate *Pitx1*, *Pitx2* and *Pitx3*, has  
363 been shown by *in situ* hybridization to be expressed on the left side of the embryo and in few  
364 neurons and is controlling left/right asymmetry<sup>26,72,94</sup>, while we observed in our data its  
365 expression only in two metacells (3 and 11) in the somite subclustering atlas (**Supplementary**  
366 **Fig. 5**). On the other hand, *Tbx1/10* has been shown to be expressed long after MRFs in the  
367 amphioxus somites<sup>11,71</sup> and we showed in our data a reduced expression in metacell 8 in the  
368 somite subclustering atlas (**Supplementary Fig. 5**), metacell we assigned to the muscular part  
369 of the trunk somites, while its expression was not detected in the other metacells expressing

370 MRFs. If our scenario of head mesoderm evolution is correct, it implies that *Pitx2* and *Tbx1*  
371 were co-opted for the control of myogenesis in the vertebrate head. In order to test this co-  
372 option, we searched for putative regulatory regions for both genes using ATAC-seq data and  
373 tested them in zebrafish reporter assays, as described above for *Gata1/2/3*. We cloned eight  
374 ATAC-seq peak regions around *Tbx1/10* (**Fig. 5c**), and six around *Pitx* (**Fig. 5e**) and we tested  
375 their activity by generating F0 transgenic zebrafish. In the case of *Tbx1/10*, only one region  
376 was able to drive the reporter gene expression (*eGFP*) in a restricted manner and we  
377 generated the corresponding F1 transgenic lines. The genomic region tested controlled the  
378 expression of the reporter gene in the zebrafish head pharyngeal mesoderm at 24 hpf and in  
379 both the head mesoderm and the finbuds at 48 hpf (**Fig. 5d**) and it contains motifs for HLH  
380 class TFs (**Fig. 5a, Supplementary Table 2**). Among this family of TF, several zebrafish  
381 *Twist* paralogues are expressed in both head mesoderm and pectoral fin bud<sup>95</sup>. This suggests  
382 that *Tbx1/10* in the chordate ancestor probably contained regulatory information that allowed  
383 its later recruitment in the vertebrate head mesoderm for a new function as a myogenesis  
384 controlling factor. In the case of *Pitx*, also only one region drove a restricted reporter  
385 expression in zebrafish at F0 and was used for generating F1 lines. In this case, expression  
386 was observed in the hatching gland at both 24 hpf and 48 hpf (**Fig. 5f**). The zebrafish hatching  
387 gland derives from the anterior prechordal plate and it expresses *Pitx2* during  
388 embryogenesis<sup>91,96-98</sup>. Interestingly, the putative enhancer region used in the tested  
389 construction contains a T-box class motif, potentially recognized by *Tbx16* from zebrafish,  
390 which is expressed in the prechordal plate<sup>99,100</sup>, and a Forkhead-class motif, potentially  
391 recognized by *Foxh1*, which is a downstream effector of the Nodal signalling pathway<sup>101</sup>, the  
392 nodal ligand gene *ndr2* being expressed in the zebrafish prechordal plate<sup>102</sup> (**Fig. 5e,**  
393 **Supplementary Table 2**). Hence, our result suggests that the *Pitx* gene in the chordate  
394 ancestor already had the potentiality to be recruited in this mesoderm region during vertebrate  
395 evolution.

396 To conclude, our cell atlas and transgenesis approaches support a scenario for the  
397 emergence of the vertebrate lateral plate mesoderm and cranial/pharyngeal mesoderm through  
398 the segregation of pre-existing cell populations (homologous to amphioxus ventral part of the  
399 somites, first pair and posterior, respectively), which, by becoming partly independent from  
400 the somites, could evolve new structures in the trunk and in the head (**Fig. 6**). We also bring  
401 new arguments for the existence of a prechordal plate-like territory in amphioxus and give  
402 insights into how the appearance of vertebrate head muscles developing from the prechordal

403 plate and cranial/pharyngeal mesoderm might have been achieved by the co-option of *Pitx2*  
404 and *Tbx1* for the control of myogenesis.

405

406

## 407 **Material and methods**

### 408 *Cell suspension preparation*

409 Adult amphioxus (*Branchiostoma lanceolatum*) were collected at the Racou beach near  
410 Argelès-sur-Mer, France. Gametes were obtained by heat stimulation as previously described  
411 in (Fuentes, Benito et al. 2007). Embryos (~100) at 21 hours post-fertilization (hpf, at 19°C)  
412 were washed 2 times in Ca<sup>2+</sup>/Mg<sup>2+</sup> -free and EDTA-free artificial seawater (CMFSW : 9  
413 mM KCl, 449 mM NaCl, 33 mM Na<sub>2</sub>SO<sub>4</sub>, 2,15 mM NaHCO<sub>3</sub>, 10 mM Tris-HCl). CMFSW  
414 was replaced by CMFSW with Liberase TM at 250µg/mL. Cells were then dissociated by a  
415 serie of pipetting and vortexing during 25 minutes at room temperature. The reaction was  
416 stopped by the addition of 1/10th volume of 500 mM EDTA. The cell suspension was  
417 centrifuged at max speed for 1 min. The pellet was resuspended in CMFSW containing  
418 Calcein violet and Propidium iodide (1 µg/mL).

419

### 420 *MARS-seq*

421 Live single cells were selected using a FACSARIA II cell sorter. To this end, we sorted only  
422 Calcein positive/PI negative cells, and doublet/multiplier exclusion was performed using FSC-  
423 W versus FSC-H. Cells were distributed into 384-wells capture plates containing 2 µl of lysis  
424 solution: 0.2% Triton and RNase inhibitors plus barcoded poly(T) reverse-transcription (RT)  
425 primers for single cell RNA-seq. Single cell libraries were prepared using MARS-seq<sup>18</sup>. First,  
426 using a Bravo automated liquid handling platform (Agilent), mRNA was converted into  
427 cDNA with an oligo containing both the unique molecule identifiers (UMIs) and cell  
428 barcodes. 0.15% PEG8000 was added to the RT reaction to increase efficiency of cDNA  
429 capture. Unused oligonucleotides were removed by Exonuclease I treatment. cDNAs were  
430 pooled (each pool representing the original 384-wells of a MARS-seq plate) and linearly  
431 amplified using T7 in vitro transcription (IVT) and the resulting RNA was fragmented and  
432 ligated to an oligo containing the pool barcode and Illumina sequences, using T4  
433 ssDNA:RNA ligase. Finally, RNA was reverse transcribed into DNA and PCR amplified. The  
434 size distribution and concentration of the resulting libraries were calculated using a  
435 TapeStation (Agilent) and Qubit (Invitrogen). scRNA-seq libraries were pooled at equimolar

436 concentration and sequenced to saturation (median 6 reads/UMI) on an Illumina NextSeq 500  
437 sequencer and using high-output 75 cycles v2.5 kits (Illumina), obtaining 483M reads in total.  
438 To quantify single-cell gene expression, MARS-seq reads were first mapped onto  
439 *Branchiostoma lanceolatum* genome (GCA\_927797965.1, annotation version 3) using STAR  
440 v2.7.3<sup>103</sup> (with parameters: `-outFilterMultimapNmax 20 -outFilterMismatchNmax 8`) and  
441 associated with exonic intervals. Mapped reads were further processed and filtered as  
442 previously described<sup>18</sup>. Briefly, UMI filtering includes two components, one eliminating  
443 spurious UMIs resulting from synthesis and sequencing errors, and the other eliminating  
444 artefacts involving unlikely IVT product distributions that are likely a consequence of second  
445 strand synthesis or IVT errors. The minimum FDR q-value required for filtering in this study  
446 was 0.02.

447

#### 448 *Single cell transcriptome clustering*

449 We used Metacell 0.37<sup>19</sup> to select gene features and construct high-granularity cell clusters  
450 (metacells), which were further annotated into cell types (see below). First, we selected  
451 informative genes using the `mcell_gset_filter_multi` function in the `metacell` R library,  
452 including genes fulfilling these criteria: a total gene UMI count > 30 and >2 UMI in at least  
453 three cells, a size correlation threshold of -0.1, and a normalized niche score threshold of 0.01.  
454 This resulted in the selection of 844 genes to be used for downstream clustering. Second, we  
455 used these genes to build a *K*-nearest neighbours cell graph with *K* = 100  
456 (`mcell_add_cgraph_from_mat_bknn` function), which was the basis to define metacells with  
457 an additional *K*-nearest neighbour procedure (`mcell_coclust_from_graph_resamp` and  
458 `mcell_mc_from_coclust_balanced` functions) using *K* = 30, minimum metacell size of 15  
459 cells, and 1,000 iterations of bootstrap resampling (at 75% of the cells); and a threshold  $\alpha = 2$   
460 to remove edges with low co-clustering weights. Third, we removed one metacell which  
461 exhibited low transcriptomic information (> 50 cells with a median UMI/cell < 500). This  
462 resulted in 176 metacell clusters, which were annotated to known cell types (**Supplementary**  
463 **Table 4**) based on the expression level of known markers (**Extended Data Fig. 1-6**).

464 We recorded gene expression in cell clusters (metacells or cell types) by computing a  
465 regularized geometric mean within each cluster and dividing this value by the median across  
466 clusters. This normalized gene expression can be interpreted as an expression fold change  
467 (FC) for a given metacell or cell type.

468 Two-dimensional projection of the metacells were created using a force-directed layout based  
469 on the metacell co-clustering graph (`mcell_mc2d_force_knn` function).

470 Gene expression profiles across cell clusters were visualized with heatmaps, using the  
471 *ComplexHeatmap* 2.10.0 R library<sup>104</sup>. Cell cluster ordering was fixed according to annotated  
472 cell types; and gene order was determined using the highest FC value per cluster. Genes were  
473 selected based on minimum differential expression per metacell/cell type, with a maximum  
474 number of markers per clusters selected in each case (the actual thresholds used in each  
475 heatmap are specified in the corresponding figure legends).  
476 Finally, we selected cells belonging to the endoderm, neural and somitic metacells  
477 (**Supplementary Table 4**), and reclustered them using the same *metacell*-based approach as  
478 described for the whole dataset (except that in this case we allowed for smaller metacells,  
479 with 10 cells; **Supplementary Table 4b-d**). The two-dimensional arrangement of the  
480 resulting metacells was curated based on the expression of cell type-specific known markers  
481 of various cell subtypes (**Supplementary Fig. 4, 5 and 6**).

482

#### 483 *ATAC-seq library preparation*

484 For ATAC-seq library construction, 25 embryos at the 21 hpf (19°C) were transferred in a 1.5  
485 ml tube, in four replicates. We then followed the method described in<sup>105</sup>. Around 50,000 cells  
486 were used for tagmentation.

487

#### 488 *Analysis of neurula regulatory regions*

489 We used the ATAC-seq data from the 21 hpf embryo to build a catalogue of neurula  
490 regulatory regions. For comparison, we also used previously published<sup>15</sup> ATAC-seq libraries  
491 of 15 hpf and 36 hpf embryos (the closest developmental timepoints available in that study;  
492 NCBI SRA accession numbers SRR6245277 to SRR6245279), as well as H3K4me3 ChIP-seq  
493 libraries from these same timepoints (SRA accession numbers SRR6245317 to SRR6245320).  
494 The ATAC-seq libraries corresponding to the 15, 21 and 36 hpf embryos were mapped  
495 separately to the *B. lanceolatum* genome using *bwa* 0.7.17 (*mem* algorithm<sup>106</sup>). The resulting  
496 BAM files were (i) filtered using *alignmentSieve* (from the *deeptools* 3.5.1 package<sup>107</sup>) to  
497 exclude weak alignments (MAPQ > 30), (ii) corrected to shift the left and right ends of reads,  
498 to account for ATAC mapping biases (+4/-5 bp in the positive and negative strands, using the  
499 *--ATACshift* flag in *alignmentSieve*), and (iii) filtered to only include nucleosome-free  
500 alignments (*--maxFragmentLength 120* with *alignmentSieve*). Duplicated reads were marked  
501 with *biobambam2* 2.0.87<sup>108</sup>, coordinate-sorted, and removed to produce filtered BAM files.  
502 Then, we concatenated the BAM files stage-wise. Normalized coverage for each stage was  
503 reported as bins per million mapped reads (BPM), calculated using the *bamCoverage* tool in



504 *deeptools*. The ChIP-seq libraries for 15 and 36 hpf were processed in the same way (except  
505 for the ATAC mapping bias correction step and the filtering of nucleosome-free alignments).

506

507 For the 21 hpf ATAC-seq experiment, we used *MACS2* 2.2.7.1<sup>109</sup> to identify regulatory  
508 elements with the *callpeak* utility, starting from the nucleosome-free filtered BAM file, with  
509 the following options: (i) an effective genome size equal to the ungapped amphioxus genome  
510 length, (ii) keeping duplicates from different libraries (*--keep-dup all* flag), (iii) retaining  
511 peaks with a *q*-value < 0.01, (iv) enabling multiple summit detection (*--call-summits* flag),  
512 and (v) disabling the modelling of peak extension for ChIP-seq libraries (*--nomodel* flag).

513 We then assigned the *MACS2*-predicted regulatory elements to their proximal genes, based on  
514 their distance to each gene's transcription start site (TSS). Specifically, we selected well-  
515 supported *MACS2* regulatory elements (*q*-value <  $1 \times 10^{-6}$ ), standardized their lengths to 250  
516 bp (125 bp to each side of the predicted peak summit), and assigned each peak to nearby  
517 genes based on distance to their TSS (excluding genes further away than 20 kbp, and genes  
518 located beyond a more proximal gene). Peaks overlapping the promoter region of a particular  
519 gene (defined based on TSS coordinates  $\pm 50/200$  bp or coincidence with H3K4me3 ChIP-  
520 seq peaks for the 15 and 36 hpf datasets) were not assigned to any other gene. The peak sets  
521 were reduced to non-overlapping sets to avoid redundant regions. These genome coordinate  
522 operations were done using the *GenomicRanges* 1.46 and *IRanges* 2.28 packages in *R*<sup>110</sup>. We  
523 used these gene-regulatory element assignments to define lists of cell type-specific regulatory  
524 elements, based on the expression specificity of each gene (expression fold change  $\geq 1.5$  in a  
525 given cell type). In parallel, we also defined a set of background regulatory regions for each  
526 cell type (consistent of regulatory regions linked to non-overexpressed genes, at fold change  $\leq$   
527 1). In total, we assigned 51,028 regulatory regions (ATAC peaks) to 19,069 genes (out of  
528 27,102), with a median of 2 peaks per gene.

529 We used the cell type-specific sets of active regulatory elements (and their corresponding  
530 background sets) to identify motifs *de novo* using the *findMotifsGenome.pl* utility in *homer*  
531 4.11<sup>111</sup>. Specifically, we set a constant peak size of 250 bp and attempted to identify motifs for  
532 each cell type, using *k*-mers of length 8, 10, 12, and 14; and tolerating up to four mismatches  
533 in the global optimization step.

534 In order to build a final motif collection for amphioxus, we concatenated the cell type-specific  
535 *de novo* motifs with known TF binding motifs from the CIS-BP database (as available the 3rd  
536 of March, 2023)<sup>112</sup>. Specifically, we used 3,547 experimentally determined motifs (with  
537 SELEX or PBMs), corresponding to vertebrate or tunicate species (*Homo sapiens*, *Mus*

538 *musculus*, *Xenopus tropicalis*, *Xenopus laevis*, *Danio rerio*, *Tetraodon nigroviridis*, *Meleagris*  
539 *gallopavo*, *Gallus gallus*, *Anolis carolinensis*, *Takifugu rubripes*, *Ciona intestinalis*, and  
540 *Oikopleura dioica*). We reduced the redundancy of this extensive *de novo* + known motif  
541 collection based on motif-motif sequence similarity, as follows: (i) we removed motifs with  
542 *homer* enrichment  $p$ -values  $< 1 \times 10^{-9}$ ; (ii) we retained with high contiguous information  
543 content (IC), defined as having  $IC \geq 0.5$  for at least four consecutive bases or  $IC \geq 0.5$  for two  
544 or more blocks of at least three bases; (iv) for each of the remaining motifs, we measured their  
545 pairwise sequence similarity by calculating the weighted Pearson correlation coefficient of the  
546 position probability matrices of each motif, using the *merge\_similar* function in the  
547 *universalmotif* 1.12.4 (Tremblay 2022) R library with a similarity threshold = 0.95 for  
548 hierarchical clustering and a minimum overlap of 6 bp between two motifs in the motif  
549 alignment step. Finally, we selected the best motif per cluster based on its IC (highest). This  
550 resulted in a final, non-redundant collection of 1,595 motifs.

551 Then, we calculated the enrichment of each motif among the sets of regulatory regions  
552 specific to each cell type. To that end, we used the *calcBinnedMotifEnrR* function in the  
553 *monalisa* 1.0 R library<sup>113</sup> to count motif occurrences in three sets of regulatory regions (bins)  
554 defined based on the expression levels of their associated genes: highly cell type-specific  
555 genes ( $FC \geq 1.5$ ), mildly cell type-specific genes ( $FC \geq 1.1$  and  $< 1.5$ ), and non-cell type-  
556 specific genes ( $FC < 1$ ). Motif occurrences were defined as motif alignments with scores  
557 above 80% of that motif's maximum alignment score (defined from the corresponding  
558 position weight matrices). Motif enrichment in each bin was then calculated using the fold  
559 change of occurrence relative to randomly sampled genomic regions (matched by GC content  
560 and length, using twice as many regions for background as for the foreground), and its  
561 significance assessed using a binomial test followed by Benjamini-Hochberg  $p$ -value  
562 adjustment. We retained the fold change and  $p$ -values for the set of highly cell type-specific  
563 regulatory regions (i.e. from genes with  $FC \geq 1.5$ ) for further analysis (**Fig. 3 and**  
564 **Supplementary Table 1**).

565 Finally, we scanned the *B. lanceolatum* genome to identify discrete occurrences of each of the  
566 1,595 motifs across the 51,028 MACS2-defined regulatory regions. We used the *findMotifHits*  
567 function in *monalisa*. In order to define *bona fide* motif alignments, we calculated an  
568 empirical  $p$ -value for each motif alignment (only best alignment per regulatory region) based  
569 on the rank of its alignment score when compared to a background distribution of randomly  
570 sampled genomic regions of similar sequence composition (only best alignment score per  
571 random background bin). Specifically, we divided the foreground regions into 10 equal-size

572 sets based on their GC content, and matched each set with random genomic background  
573 sequences (not in the foreground) of similar GC content (same category) and equal length (set  
574 to 250 bp). These motif alignments were used to identify enhancer-specific motifs in **Fig. 5**  
575 (complete list in **Supplementary Table 2**).

576

### 577 *Cross-species cell type comparison*

578 We used SAMap 1.0.2 [ref] to evaluate the similarity between *B. lanceolatum* cell types and  
579 the previously published developmental single-cell transcriptomes of *Danio rerio*<sup>41</sup> (reference  
580 gene set in original study: GRCz10 v1), *Xenopus tropicalis*<sup>40</sup> (reference gene set in original  
581 study: Xenbase version 9.0), and *Ciona intestinalis*<sup>39</sup> (reference gene set in original study:  
582 KH2012 from the Ghost Database ([http://ghost.zool.kyoto-u.ac.jp/download\\_kh.html](http://ghost.zool.kyoto-u.ac.jp/download_kh.html))).

583 For each query species, we used the UMI tables corresponding to the timepoints closest to the  
584 *B. lanceolatum* 21hpf developmental stage (12 in total): 14 hpf, 18 hpf and 24 hpf for *D. rerio*  
585 (GEO accession: GSE112294); S14, S16, S18, S20 and S22 for *X. tropicalis* (GSE113074);  
586 and the initial, early, middle and late tailbud stages for *C. intestinalis* (GSE131155). For *C.*  
587 *intestinalis*, we used the cell type annotations used in the original paper. For the two  
588 vertebrates, we used the consensus cell annotations employed by Tarashansky *et al.*<sup>114</sup>.

589 To run SAMap, we first created a database of pairwise alignments with *blastp* 2.5.0  
590 (comparing *B. lanceolatum* peptides to each query species separately; in the case of *Danio*  
591 *rerio* we used *blastx/tblastn* instead of *blastp* as the original gene set<sup>41</sup> was only available as  
592 un-translated transcripts). Second, we used the cell-level UMI counts of each gene to calculate  
593 the SAMap mapping scores for each pair of cell types (between *B. lanceolatum* and each of  
594 the 12 query developmental datasets in other species), using all cells within each cluster for  
595 score calculation.

596 Finally, we identified shared marker genes between cell types of *B. lanceolatum* and the query  
597 chordate species by identifying sets of cell type-overexpressed genes with the *scanpy* 1.9.3<sup>115</sup>  
598 *rank\_genes\_groups* function to calculate cell type-level fold change values and  
599 overexpression significance (Wilcoxon rank-sum tests followed by BH *p*-value adjustment).

600 For each species, cell type-specific genes were then determined based on fold change and  
601 overexpression significance (at adjusted  $p < 0.05$  and  $FC \geq 1$ ). For cross-species comparisons,  
602 genes were linked based on shared orthology group membership. Orthology groups between  
603 genes of the the four species were determined using *Broccoli* 1.1<sup>116</sup> (using predicted peptides  
604 as input; disabling the *k*-mer clustering step; using up to 10 hits per species for maximum-

605 likelihood phylogenetic tree calculations; and adding two additional chordates for better  
606 coverage: *Mus musculus* and *B. floridae*).

607 We also performed a more detailed analysis of shared TFs between amphioxus and the other  
608 three chordates, selecting cell type-specific amphioxus TFs ( $p < 0.05$  and  $FC \geq 1.25$ ; see  
609 below details on TF annotation) and evaluating whether their orthologs in chordates were also  
610 over-expressed in cell types homologous to the amphioxus endoderm (in this case, it was  
611 compared to endodermal tissues in the other chordates), endostyle (to other endodermal  
612 tissues), muscular somites (to vertebrate skeletal muscle and tunicate muscle/heart), somites  
613 (to vertebrate presomitic mesoderm or tunicate muscle/heart), notochord (to other notochordal  
614 tissues) hypothalamus and neurons (each of which was compared to vertebrate neurons,  
615 hindbrain, forebrain/midbrain, notoplate and neuroendocrine cells; and to the tunicate nervous  
616 system), and the anterior and posterior epidermis (each compared to epidermal progenitors,  
617 ionocytes, small secretory epidermal cells, goblet cells, and hatching gland).

618

### 619 ***Gene family annotation***

620 We ran gene phylogenies to refine the orthology assignments of TF gene families. We used  
621 translated peptide sequences from 32 metazoan (longest isoforms per gene, **Supplementary**  
622 **Table 3**, which were scanned using *hmmsearch* (*HMMER* 3.3.2<sup>117</sup>) to identify hits of TF-  
623 specific HMM profiles (from Pfam 33.0<sup>118</sup>) representing their corresponding DNA-binding  
624 regions. For each gene family, the collection of homologous proteins was aligned to itself  
625 using *diamond blastp* v0.9.36<sup>119</sup> and clustered into low-granularity homology groups using  
626 the Markov Cluster Algorithm *MCL* v14.137<sup>120</sup> (using alignment bit-scores as weights, and a  
627 gene family-specific inflation parameter; **Supplementary Table 3b**). Then, each homology  
628 group was aligned using *mafft* 7.475<sup>121</sup> (E-INS-i mode, up to 10,000 refinement iterations).  
629 The alignments were trimmed with *clipkit* 1.1.3<sup>122</sup> (*kpic-gappy* mode and a gap threshold =  
630 0.7) and used to build phylogenetic trees with *IQ-TREE* v2.1<sup>123</sup> (running each tree for up to  
631 10,000 iterations until convergence threshold of 0.999 is met for 200 generations; the best-  
632 fitting evolutionray model was selected with *ModelFinder*<sup>124</sup>; statistical supports were  
633 obtained using the UFBoot procedure with 1,000 iterations (Hoang, Chernomor et al. 2018)).  
634 Outlier genes were removed from each tree using *treeshrink* v1.3.363 (gene-wise mode using  
635 the centroid rooting algorithm; scaling factors set to  $a = 10$  and  $b = 1$ ); and the trees were  
636 recalculated if necessary if any outgroup needed to be removed. Finally, we used *Possvm*  
637 1.1<sup>125</sup> to identify orthology groups from each gene tree (with up to 10 steps of iterative gene

638 tree rooting), and annotated the orthogroups and the *B. lanceolatum* TFs with reference  
639 human gene names.

640 For genes used to assign metacells to known amphioxus embryonic territories and named in  
641 the manuscript, we either used the previously published amphioxus gene names when they  
642 exist, or a name based on fine orthology analysis. Amino acid sequences from *B. lanceolatum*  
643 were used to search Genbank for putative homologues by *blasp*. Sequences were aligned  
644 using *ClustalX*<sup>126</sup>. Alignments were manually corrected in *SeaView*<sup>127</sup>. Maximum Likelihood  
645 phylogenetic trees were reconstructed using *IQ-TREE* v2.1<sup>123</sup> with default parameters (fast  
646 bootstrapping and automatic best model search). Genes with no clear orthology signal were  
647 named based on the presence of known protein domains.

648

#### 649 ***In situ hybridization***

650 DIG labeled probes were synthesized from fragments cloned into pBKS, or from PCR  
651 amplified DNA fragments purchased at IDT, using the appropriate RNA polymerase (T7, T3  
652 or SP6) and the DIG-labeling Mix (Roche). Embryos at 21 hpf (19°C) were fixed in  
653 paraformaldehyde (PFA) 4% in MOPS buffer, dehydrated in 70% ethanol and kept at -20°C.  
654 *In situ* hybridization was undertaken as previously described in<sup>26</sup>. The accession  
655 numbers/sequences used for probe synthesis are given in **Supplementary Table 5**.

656

#### 657 ***Zebrafish transgenesis***

658 The putative regulatory regions were cloned after PCR amplification on genomic DNA in the  
659 PCR8/GW/TOPO vector (Life Technologies). Using Gateway technology (Life  
660 Technologies), the inserts were then shuttled into an enhancer detection vector composed of a  
661 *gata2* minimal promoter, an enhanced GFP reporter gene, and a strong midbrain enhancer  
662 (z48) that works as an internal control for transgenesis in zebrafish<sup>128</sup>. Transgenic embryos  
663 were generated using the Tol2 transposase system<sup>129</sup>. Briefly, 1-cell stage embryos were  
664 injected with 2 nl of a mix containing 25 ng/μL of Tol2 transposase mRNA, 20ng/μL of  
665 purified vector, and 0,05% of phenol red. Injected embryos were raised until the desired stage,  
666 visualized under an Olympus SZX16 fluorescence stereoscope and photographed with an  
667 Olympus DP71 camera.

668

669 **Statement that all experiments were performed in accordance with relevant guidelines**  
670 **and regulations.**

671 All the experiments were performed following the Directive 2010/63/EU of the European  
672 parliament and of the council of 22 September 2010 on the protection of animals used for  
673 scientific purposes. Ripe adults from the Mediterranean invertebrate amphioxus species (*B.*  
674 *lanceolatum*) were collected at the Racou beach near Argelès-sur-Mer, France, (latitude 42°  
675 32' 53' ' N and longitude 3° 3' 27' ' E) with specific permission from the Prefect of Region  
676 Provence Alpes Côte d'Azur. Zebrafish embryos were obtained from AB and Tübingen  
677 strains, and manipulated following protocols approved by the Ethics Committee of the  
678 Andalusia Government and the national and European regulation established.

679

680 **Data availability.**

681 Accession numbers of sequences used for in situ hybridization probe synthesis are given in  
682 Supplementary Tables 5. The accession numbers for the sequences are available in Genbank.

683

## 684 **Figure and Figure legends**

685

686 **Figure 1. Amphioxus neurula cell type atlas.** **a**, drawings of Mediterranean amphioxus  
687 developmental stages from the egg to the larva (with one open gill slit) stage. The  
688 developmental time (hours post fertilization, hpf) is given for embryos raised at 19°C, and we  
689 highlight the neurula stage presented in this study (21 hpf). **b**, Two-dimensional projection of  
690 cell clusters (metacells) using a force-directed layout based on the co-clustering graphs for  
691 individual cells (see *Methods*). Metacells are colour-coded by cell type. **c**, Normalized fold  
692 change expression of top variable genes (rows) per metacell (columns, grouped by cell type).  
693 For each metacell, we selected up to 30 markers with a minimum fold change  $\geq 2$ . Selected  
694 gene names from known markers, used to annotate each cell type, are indicated to the right of  
695 the heatmap. Genes in bold case are shown in panel d. **d**, Pie charts depicting the fraction of  
696 cells mapped to each cell type among the cell transcriptomes and the cell counting experiment  
697 (top); and the 3D reconstruction with assignment of nuclei to each germ layer (bottom). A  
698 transverse section is shown on the left, and dorsal views with anterior to the top on the right  
699 (full, without epidermis nuclei, without epidermis and neural cells nuclei. **e**, Expression  
700 profile of previously unknown marker genes for specific cell types (neural, endoderm,  
701 anterior epidermis, cerebral vesicle, notochord, and tailbud) analyzed by *in situ* hybridization  
702 (ISH, top, with anterior to the left and dorsal to the top in side views) and corresponding two-  
703 dimensional expression maps (bottom, based on the same layout as panel b). Gene expression  
704 is shown as density maps representing UMI counts (per 10,000 UMIs) in each cell.

705

706 **Figure 2. Cross-species comparison with other chordate developmental datasets.** **a**,  
707 Comparison between cell type transcriptomes of the amphioxus neurula stage (rows) and  
708 matched developmental time-points (columns) in the chordates *Ciona intestinalis* (initial to  
709 late tailbud stage), *Danio rerio* (14 hpf to 24 hpf), and *Xenopus tropicalis* (S14 to S22 stages).  
710 Cell type similarity was measured using SAMap scores based on all available pairwise  
711 markers (see *Methods*). Cell types are colour-coded by developmental layer (endoderm,  
712 mesoderm/muscle, neuroectoderm, ectoderm, and other), and, in the case of the multi-stage  
713 chordate datasets, by developmental time-point (colour intensity). **b**, Graph representation of  
714 transcription factors (TFs, circular nodes) shared (i.e. connected by an edge) between  
715 amphioxus and homologous cell types in *Ciona*, *Danio* and *Xenopus* (square nodes). Specific  
716 TFs are considered to be shared between two cell types if they are significantly overexpressed

717 in both. TFs in bold are shared between all species considered. For amphioxus, we required  
718 fold-change  $> 1.25$ , and BH-adjusted  $p$ -value  $< 0.05$ . For the matched cell types from other  
719 species, we required significant overexpression in at least one of the developmental time-  
720 points considered. A complete list of genes shared between all pairs of cell types is available  
721 in Supplementary Table 1.

722

723 **Figure 3. Regulatory landscape of neurula cell types. a**, Heatmap representing the  
724 enrichment of specific TF binding motifs (columns) in the regulatory regions of genes in each  
725 cell type of the amphioxus neurula (rows). Names from selected motifs are indicated next to  
726 the heatmap (in bold those that also appear in panel b). The amphioxus motif library was  
727 obtained by merging experimentally determined vertebrate motifs from CIS-BP with *de novo*  
728 inferred motifs for each amphioxus cell type, and removing redundancy (see *Methods*).  
729 Therefore, motif names do not represent specific amphioxus TFs, but rather sequence  
730 similarity with motifs of vertebrate homologs. The regulatory regions associated with each  
731 gene were obtained from a bulk ATAC-seq experiment. **b**, Examples of cell type-specific  
732 amphioxus TFs whose expression levels (vertical axis, as  $\log_2(\text{FC})$ ) match the enrichment of  
733 associated motifs (horizontal axis; shown below as information content logos). Circle size is  
734 proportional to the BH-adjusted  $-\log_{10}(p)$  of motif enrichment (shown only for significant  
735 enrichment at  $p < 0.01$ ).

736

737 **Figure 4. Subclustering reveals new cell types. a**, 2D projection of neural metacells on a  
738 dorsal view scheme of an amphioxus neurula stage embryo with anterior to the left. **b**, Gene  
739 expression distribution on 2D projected cells for selected neural gene markers and  
740 corresponding ISH. Gene expression is shown as density maps representing UMI counts (per  
741 10,000 UMIs) in each cell, with cells positioned in the vicinity of their corresponding  
742 metacells. **c**, 2D projection of endoderm metacells on a side view scheme of an amphioxus  
743 neurula stage embryo with anterior to the left and dorsal to the top. **d**, Gene expression  
744 distribution on 2D projected cells for selected endoderm gene markers and corresponding  
745 ISH. **e**, 2D projection of somite metacells on a side view scheme of an amphioxus neurula  
746 stage embryo with anterior to the left and dorsal to the top. **f**, Gene expression distribution on  
747 2D projected cells for selected somite gene markers and corresponding ISH.

748

749



750 **Figure 5. Analysis of the activity of putative regulatory regions of amphioxus genes in**  
751 **zebrafish. a,** Identification of putative enhancers of *Gata1/2/3* in amphioxus, based on the  
752 examination of bulk ATAC-seq experiments (at 15 hpf, 21 hpf, and 36 hpf, measured in bins  
753 per million mapped reads, or BPM). ATAC-seq peaks at 21 hpf are showed in dark grey.  
754 Candidate enhancer regions are shown in purple. Mapped TF motifs are shown in red. The  
755 right panel to the right shows a zoom-in of the enhancer region cloned in the reporter  
756 construct in panel b (grey-shaded region), highlighting some of its unique TF motifs (top, *p*-  
757 values reflect significance of enrichment of the motif in that genomic window; see *Methods*  
758 and **Supplementary Table 2** for the complete list) and the TF binding signatures for each  
759 ATAC-seq library (expressed as *TOBIAS*-corrected ATAC cut sites, where negative values  
760 indicate regions that are putatively bound by a protein). **b,** GFP signal in F1 transgenic  
761 zebrafish embryos for the *Gata1/2/3* construct. Subpanels I to III show the lateral view  
762 (anterior to the left) of 24 hpf or 48 hpf embryos showing green fluorescence in the  
763 pharyngeal mesoderm (arrows). Subpanel IV shows a dorsal view of the same 48 hpf  
764 individual from panel III with green fluorescence in the fin buds (arrowheads). The  
765 fluorescence observed in the midbrain corresponds to the positive control included into the  
766 reporter constructs and is indicated by a white asterisk. **c,** Same as panel a, indicating putative  
767 enhancers of *Tbx1/10* in amphioxus (left) and the unique motifs and TF binding signatures of  
768 the reporter enhancer (right). **d,** Same as panel b, showing green fluorescence in the  
769 pharyngeal mesoderm from lateral viewpoints (arrows, subpanels I to III) and fin buds from a  
770 dorsal viewpoint (arrowheads, subpanel IV), at different developmental stages (24 and 48  
771 hpf). **e,** Same as panels a and c, indicating putative enhancers of *Pitx* (left) and the unique  
772 motifs and TF binding signatures of the reporter enhancer (right). **f,** Same as panels b and d,  
773 showing green fluorescence in the hatching gland cells from lateral (arrows, subpanels I to III)  
774 and ventral (IV) viewpoints, at different developmental stages (24 and 48 hpf).

775

776 **Figure 6. Evolutionary scenario for mesoderm evolution in chordates.** Schemes of  
777 putative embryos in dorsal views with anterior to the top are shown, with transverse sections  
778 at the level of the anterior and trunk regions on the left. Diagrams on the right represent  
779 mesoderm cell populations that were inferred at each step. We propose that the chordate  
780 ancestor possessed a mesoderm organized in an axial domain with two cell populations: a  
781 prechordal-plate like region in the anterior part (dark purple), and a notochord (light purple)  
782 more posteriorly; and a paraxial domain completely segmented into somites (green),  
783 containing in the ventral part a cell population homologous to the ventral part of amphioxus

784 somites (orange), and showing heterogeneity between the anterior (dark orange/green) and  
785 trunk (light orange/green) regions. During the first step of evolution, we propose that the  
786 ventral somite cell populations became independent from the paraxial mesoderm to give rise  
787 to the unsegmented lateral plate mesoderm (orange). In a second step, the anterior paraxial  
788 mesoderm would have been lost (dark green), and we previously proposed that this could be  
789 due to a change in the function of the FGF signalling pathway<sup>11,12</sup>. This loss would have led to  
790 a relaxation of the developmental constraints imposed by the segmented paraxial mesoderm in  
791 the anterior region, enabling remodelling of the tissues of the anterior axial mesoderm (dark  
792 purple) and anterior lateral mesoderm (dark orange), which could have evolved into the  
793 prechordal plate (pink) and pharyngeal/cranial mesoderm (blue/green). The ability of these  
794 new embryonic structures, derived from non-myogenic cell populations, to form muscles,  
795 would have been associated with the co-option of *Pitx2* and *Tbx1/10* as master genes of the  
796 myogenesis program.

797

798

799 **Supplementary Files:**

800 **Supplementary Figure 1. scRNA-seq and ATAC-seq summary statistics (related to Fig.**  
801 **1 and 3).** **a**, Number of cells per metacell cluster. distribution of UMIs/cell in each metacell,  
802 and total number of UMIs per metacell. **b**, Fraction of reads in each ATAC-seq sample (and  
803 the pooled dataset) that are duplicated, nucleosome-free (NFR), or mapping in peaks. **c**, Inter-  
804 sample similarity for the ATAC-seq replicates, measured using the Pearson correlation  
805 coefficient of binned raw counts in the nucleosome-free fraction (bin size = 10 kbp). **d**, Insert  
806 size distribution of the pool of ATAC-seq replicates. The dotted line indicates the threshold to  
807 define the nucleosome-free fraction (120 bp). **e**, Enrichment of ATAC-seq signal around  
808 transcription start sites (TSS), calculated using binned normalised coverage (bin size = 50 bp).  
809 **f**, Fraction of ATAC-seq peaks overlapping various features in the genome. **g**, Cumulative  
810 distribution of the normalised ATAC-seq signal at the TSS of genes, sorted in five equally-  
811 sized bins according to their expression levels (low to high, measured in UMI counts). Highly  
812 expressed genes in our scRNA-seq data exhibit stronger bulk ATAC-seq signals. **h**,  
813 Distribution of number of ATAC-seq peaks detected per gene, in global (left) and for specific  
814 subsets of gene families (TFs, signalling-related genes, and neural-related genes; right).

815

816 **Supplementary Figure 2. *In situ* hybridization of genes showing an enriched expression**  
817 **in some metacells and for which expression was not previously described.** *In situ*  
818 hybridization experiments were undertaken on N3 stage embryos. Dorsal views with anterior  
819 to the left (top) and side views with anterior to the left and dorsal to the top are shown for  
820 each gene. Schemes of embryo showing in blue the region in which each series of genes is  
821 expressed is presented on the left. Below each *in situ* hybridization picture, transcriptomic  
822 expression of the marker is shown as density maps representing UMI counts (per 10,000  
823 UMIs) in each cell, using the same two-dimensional metacell arrangement as in **Fig. 1**.

824

825 **Supplementary Figure 3. Transcription factor expression and motif activity (related to**  
826 **Fig. 1 and Fig. 3).** **a**, Normalized fold change expression of top variable TFs (rows) per  
827 metacell (columns, grouped by cell type). For each metacell, we selected TFs with a minimum  
828 fold change  $\geq 2$  and a total of 10 UMIs across all cells. Gene names in bold indicate that the  
829 gene is mentioned in the manuscript. **b**, Enrichment fold change of top variable TF binding  
830 motifs (rows) per cell type (columns). For each cell type, we selected up to 60 motifs with a  
831 minimum fold change  $\geq 1.2$  and enrichment BH-adjusted  $p$ -value  $< 0.05$ . Motifs are color-  
832 coded based on their sequence similarity to motifs of known TF structural classes (see

833 *Methods*): light gray indicates *de novo* motifs without similar motifs in known databases,  
834 whereas dark gray and other colors indicate motifs that can be mapped to one or more  
835 previously described TF binding motifs. Motifs in bold are mentioned in the manuscript.

836

837 **Supplementary Figure 4. Gene expression distribution on 2D projected cells for neural**  
838 **gene markers (related to Fig. 3).** **a**, Schematics of inferred neural metacell locations over an  
839 amphioxus neurula-stage embryo, dorsal view. **b**, Gene expression is shown as density maps  
840 representing UMI counts (per 10,000 UMIs) in each cell, with cells positioned in the vicinity  
841 of their corresponding metacells. The metacells have been arranged based on their inferred  
842 position in the neurula embryo (**Fig. 3a**). Markers were selected from the literature and from  
843 ISH analysis of newly discovered genes overexpressed in specific metacells in our dataset.

844

845 **Supplementary Figure 5. Gene expression distribution on 2D projected cells for**  
846 **endoderm gene markers (related to Fig. 3).** **a**, Schematics of inferred endoderm metacell  
847 locations over an amphioxus neurula-stage embryo, lateral view. **b**, Gene expression is shown  
848 as density maps representing UMI counts (per 10,000 UMIs) in each cell, with cells  
849 positioned in the vicinity of their corresponding metacells. The metacells have been arranged  
850 based on their inferred position in the neurula embryo (**Fig. 3c**). Markers were selected from  
851 the literature and from ISH analysis of newly discovered genes overexpressed in specific  
852 metacells in our dataset.

853

854 **Supplementary Figure 6. Gene expression distribution on 2D projected cells for somite**  
855 **gene markers (related to Fig. 3).** **a**, Schematics of inferred somite metacell locations over an  
856 amphioxus neurula-stage embryo, side view. **b**, Gene expression is shown as density maps  
857 representing UMI counts (per 10,000 UMIs) in each cell, with cells positioned in the vicinity  
858 of their corresponding metacells. The metacells have been arranged based on their inferred  
859 position in the neurula embryo (**Fig. 3e**). Markers were selected from the literature and from  
860 ISH analysis of newly discovered genes overexpressed in specific metacells in our dataset.

861

862 **Supplementary Table 1. Shared orthologous markers between chordate developmental**  
863 **cell types and stages (related to Fig. 2).** This table includes genes overexpressed in various  
864 cell types of the *B. lanceolatum* neurula transcriptome (reference species 1) and their  
865 overexpressed orthologs in other species (species 2 column: *C. intestinalis* or Cint, *X.*  
866 *tropicalis* or Xentro, or *D. rerio* or Drer). For each gene pair, we indicate in which cell type it

867 is overexpressed in each species (and, for the query species 2, which developmental stage);  
868 their expression fold change and BH-adjusted enrichment  $p$ -value (from Wilcoxon rank sum  
869 tests) in both species; the gene name in amphioxus; and whether the gene is a TF or not.

870

871 **Supplementary Table 2. TF binding motifs in *Tbx1/10*, *Gata1/2/3* and *Pitx* candidate**  
872 **enhancers (related to Fig. 5).** List of motifs aligned to each ATAC-seq peak in the vicinity  
873 of three regions of interest around the TFs *Tbx1/10*, *Gata1/2/3* and *Pitx*. For each aligned  
874 motif, we list the regulatory region where it was found, whether the region was found to drive  
875 specific expression in zebrafish embryos (“is expression driver” column; **Fig. 5**), whether the  
876 region was tested in zebrafish (“is cloned” column), the motif ID and its annotation based on  
877 similarity to known CIS-BP motifs; whether the motif is exclusive to the regulatory region  
878 found to drive expression (“is motif exclusive to successful driver?” column), its alignment  
879 coordinates along the genome, its alignment score and empirical  $p$ -value, and the aligned  
880 sequence.

881

882 **Supplementary Table 3. Gene family annotation information. a,** Species used for the gene  
883 phylogenetic analyses of TFs, including the data sources and their taxonomy. **b,** List of TF  
884 families analyzed, including the representative Pfam domains, the *hmmsearch* threshold  
885 strategy, and the inflation parameter employed in MCL clustering. **c,** Phylogeny-based  
886 classification of amphioxus TFs, with orthogroup names taken from the human orthologs of  
887 each gene (using *Possvm*).

888

889 **Supplementary Table 4. Cell type annotation table. a,** Cell type annotations of all metacell  
890 clusters in the neurula transcriptome. For each metacell, we indicate its cell type,  
891 developmental layer, and whether it has been included in further reclustering analyses. **b-d,**  
892 Annotations of metacells for the neural, endodermal and somitic reclustering analyses.

893

894 **Supplementary Table 5.** Sequences used for probe synthesis.

895

896

## 897 **References**

898

- 899 1 Annona, G., Holland, N. D. & D'Aniello, S. Evolution of the notochord. *Evodevo* **6**,  
900 30, doi:10.1186/s13227-015-0025-3 (2015).
- 901 2 Delsuc, F., Brinkmann, H., Chourrout, D. & Philippe, H. Tunicates and not  
902 cephalochordates are the closest living relatives of vertebrates. *Nature* **439**, 965-968,  
903 doi:10.1038/nature04336 (2006).
- 904 3 Lemaire, P. Evolutionary crossroads in developmental biology: the tunicates.  
905 *Development* **138**, 2143-2152, doi:10.1242/dev.048975 (2011).
- 906 4 Holland, L. Z. Genomics, evolution and development of amphioxus and tunicates: The  
907 Goldilocks principle. *Journal of Experimental Zoology Part B: Molecular and*  
908 *Developmental Evolution* **324**, 342-352, doi:<https://doi.org/10.1002/jez.b.22569>  
909 (2015).
- 910 5 Bertrand, S. & Escriva, H. Evolutionary crossroads in developmental biology:  
911 amphioxus. *Development* **138**, 4819-4830, doi:10.1242/dev.066720 (2011).
- 912 6 Escriva, H. My Favorite Animal, Amphioxus: Unparalleled for Studying Early  
913 Vertebrate Evolution. *BioEssays* **40**, 1800130,  
914 doi:<https://doi.org/10.1002/bies.201800130> (2018).
- 915 7 Holland, L. Z. & Onai, T. Early development of cephalochordates (amphioxus).  
916 *WIREs Developmental Biology* **1**, 167-183, doi:<https://doi.org/10.1002/wdev.11>  
917 (2012).
- 918 8 Prummel, K. D., Nieuwenhuize, S. & Mosimann, C. The lateral plate mesoderm.  
919 *Development* **147** (2020).
- 920 9 Diogo, R. *et al.* A new heart for a new head in vertebrate cardiopharyngeal evolution.  
921 *Nature* **520**, 466-473, doi:10.1038/nature14435 (2015).
- 922 10 Sambasivan, R., Kuratani, S. & Tajbakhsh, S. An eye on the head: the development  
923 and evolution of craniofacial muscles. *Development* **138**, 2401-2415 (2011).
- 924 11 Aldea, D. *et al.* Genetic regulation of amphioxus somitogenesis informs the evolution  
925 of the vertebrate head mesoderm. *Nat Ecol Evol* **3**, 1233-1240, doi:10.1038/s41559-  
926 019-0933-z (2019).
- 927 12 Meister, L., Escriva, H. & Bertrand, S. Functions of the FGF signalling pathway in  
928 cephalochordates provide insight into the evolution of the prechordal plate.  
929 *Development* **149**, doi:10.1242/dev.200252 (2022).
- 930 13 Bertrand, S. *et al.* The Ontology of the Amphioxus Anatomy and Life Cycle  
931 (AMPHX). *Front Cell Dev Biol* **9**, 668025, doi:10.3389/fcell.2021.668025 (2021).
- 932 14 Carvalho, J. E. *et al.* An Updated Staging System for Cephalochordate Development:  
933 One Table Suits Them All. *Front Cell Dev Biol* **9**, 668006,  
934 doi:10.3389/fcell.2021.668006 (2021).
- 935 15 Marletaz, F. *et al.* Amphioxus functional genomics and the origins of vertebrate gene  
936 regulation. *Nature* **564**, 64-70, doi:10.1038/s41586-018-0734-6 (2018).
- 937 16 Duboule, D. Temporal colinearity and the phylotypic progression: a basis for the  
938 stability of a vertebrate Bauplan and the evolution of morphologies through  
939 heterochrony. *Development* **1994**, 135-142 (1994).
- 940 17 Ferran, J. L., Irimia, M. & Puelles, L. Is there a prechordal region and an acroterminal  
941 domain in amphioxus? *Brain, Behavior and Evolution* (2022).
- 942 18 Keren-Shaul, H. *et al.* MARS-seq2.0: an experimental and analytical pipeline for  
943 indexed sorting combined with single-cell RNA sequencing. *Nature Protocols* **14**,  
944 1841-1862, doi:10.1038/s41596-019-0164-4 (2019).

- 945 19 Baran, Y. *et al.* MetaCell: analysis of single-cell RNA-seq data using K-nn graph  
946 partitions. *Genome biology* **20**, 1-19 (2019).
- 947 20 Albuixech-Crespo, B. *et al.* Molecular regionalization of the developing amphioxus  
948 neural tube challenges major partitions of the vertebrate brain. *PLoS Biol* **15**,  
949 e2001573, doi:10.1371/journal.pbio.2001573 (2017).
- 950 21 Bertrand, S., Somorjai, I., Garcia-Fernandez, J., Lamonerie, T. & Escriva, H. FGFR1  
951 is a neglected putative actor of the FGF signalling pathway present in all major  
952 metazoan phyla. *BMC Evolutionary Biology* **9**, 226, doi:10.1186/1471-2148-9-226  
953 (2009).
- 954 22 Glardon, S., Holland, L. Z., Gehring, W. J. & Holland, N. D. Isolation and  
955 developmental expression of the amphioxus Pax-6 gene (AmphiPax-6): insights into  
956 eye and photoreceptor evolution. *Development* **125**, 2701-2710 (1998).
- 957 23 Qian, G., Li, G., Chen, X. & Wang, Y. Characterization and embryonic expression of  
958 four amphioxus Frizzled genes with important functions during early embryogenesis.  
959 *Gene Expression Patterns* **13**, 445-453 (2013).
- 960 24 Belgacem, M. R., Escande, M.-I., Escriva, H. & Bertrand, S. Amphioxus Tbx6/16 and  
961 Tbx20 embryonic expression patterns reveal ancestral functions in chordates. *Gene  
962 Expression Patterns* **11**, 239-243 (2011).
- 963 25 Brooke, N. M., Garcia-Fernandez, J. & Holland, P. W. H. The ParaHox gene cluster is  
964 an evolutionary sister of the Hox gene cluster. *Nature* **392**, 920-922,  
965 doi:10.1038/31933 (1998).
- 966 26 Somorjai, I., Bertrand, S., Camasses, A., Haguenaer, A. & Escriva, H. Evidence for  
967 stasis and not genetic piracy in developmental expression patterns of Branchiostoma  
968 lanceolatum and Branchiostoma floridae, two amphioxus species that have evolved  
969 independently over the course of 200 Myr. *Dev Genes Evol* **218**, 703-713 (2008).
- 970 27 Benito-Gutierrez, E., Illas, M., Comella, J. X. & Garcia-Fernandez, J. Outlining the  
971 nascent nervous system of Branchiostoma floridae (amphioxus) by the pan-neural  
972 marker AmphiElav. *Brain Res Bull* **66**, 518-521 (2005).
- 973 28 Kaltenbach, S. L., Yu, J. K. & Holland, N. D. The origin and migration of the  
974 earliest developing sensory neurons in the peripheral nervous system of amphioxus.  
975 *Evolution & development* **11**, 142-151 (2009).
- 976 29 Rasmussen, S. L., Holland, L. Z., Schubert, M., Beaster-Jones, L. & Holland, N. D.  
977 Amphioxus AmphiDelta: evolution of Delta protein structure, segmentation, and  
978 neurogenesis. *Genesis* **45**, 113-122 (2007).
- 979 30 Williams, N. A. & Holland, P. W. Old head on young shoulders. *Nature* **383**, 490-490  
980 (1996).
- 981 31 Ferrier, D. E., Brooke, N. M., Panopoulou, G. & Holland, P. W. The Mnx homeobox  
982 gene class defined by HB9, MNR2 and amphioxus AmphiMnx. *Development Genes &  
983 Evolution* **211** (2001).
- 984 32 Meulemans, D. & Bronner-Fraser, M. Insights from amphioxus into the evolution of  
985 vertebrate cartilage. *PLoS One* **2**, e787, doi:10.1371/journal.pone.0000787 (2007).
- 986 33 Shimeld, S. An amphioxus netrin gene is expressed in midline structures during  
987 embryonic and larval development. *Dev Genes Evol* **210**, 337-344,  
988 doi:10.1007/s004270000073 (2000).
- 989 34 Shimeld, S. M. Characterisation of amphioxus HNF-3 genes: conserved expression in  
990 the notochord and floor plate. *Dev Biol* **183**, 74-85, doi:10.1006/dbio.1996.8481  
991 (1997).
- 992 35 Wu, H. R. *et al.* Asymmetric localization of germline markers Vasa and Nanos during  
993 early development in the amphioxus Branchiostoma floridae. *Dev Biol* **353**, 147-159,  
994 doi:10.1016/j.ydbio.2011.02.014 (2011).

- 995 36 Zhang, Q. J., Luo, Y. J., Wu, H. R., Chen, Y. T. & Yu, J. K. Expression of germline  
996 markers in three species of amphioxus supports a preformation mechanism of germ  
997 cell development in cephalochordates. *Evodevo* **4**, 17, doi:10.1186/2041-9139-4-17  
998 (2013).
- 999 37 Holland, N. D., Venkatesh, T. V., Holland, L. Z., Jacobs, D. K. & Bodmer, R.  
1000 *AmphiNk2-tin*, an amphioxus homeobox gene expressed in myocardial progenitors:  
1001 insights into evolution of the vertebrate heart. *Dev Biol* **255**, 128-137,  
1002 doi:10.1016/s0012-1606(02)00050-7 (2003).
- 1003 38 Mazet, F. The Fox and the thyroid: the amphioxus perspective. *Bioessays* **24**, 696-699  
1004 (2002).
- 1005 39 Cao, C. *et al.* Comprehensive single-cell transcriptome lineages of a proto-vertebrate.  
1006 *Nature* **571**, 349-354, doi:10.1038/s41586-019-1385-y (2019).
- 1007 40 Briggs, J. A. *et al.* The dynamics of gene expression in vertebrate embryogenesis at  
1008 single-cell resolution. *Science* **360**, eaar5780 (2018).
- 1009 41 Wagner, D. E. *et al.* Single-cell mapping of gene expression landscapes and lineage in  
1010 the zebrafish embryo. *Science* **360**, 981-987 (2018).
- 1011 42 Leon, A. *et al.* Gene Regulatory Networks of Epidermal and Neural Fate Choice in a  
1012 Chordate. *Mol Biol Evol* **39**, doi:10.1093/molbev/msac055 (2022).
- 1013 43 Li, L. *et al.* TFAP2C- and p63-Dependent Networks Sequentially Rearrange  
1014 Chromatin Landscapes to Drive Human Epidermal Lineage Commitment. *Cell Stem*  
1015 *Cell* **24**, 271-284 e278, doi:10.1016/j.stem.2018.12.012 (2019).
- 1016 44 Miles, L. B. *et al.* Mis-expression of grainyhead-like transcription factors in zebrafish  
1017 leads to defects in enveloping layer (EVL) integrity, cellular morphogenesis and axial  
1018 extension. *Sci Rep* **7**, 17607, doi:10.1038/s41598-017-17898-7 (2017).
- 1019 45 Pera, E., Stein, S. & Kessel, M. Ectodermal patterning in the avian embryo: epidermis  
1020 versus neural plate. *Development* **126**, 63-73 (1999).
- 1021 46 Segre, J. A., Bauer, C. & Fuchs, E. Klf4 is a transcription factor required for  
1022 establishing the barrier function of the skin. *Nat Genet* **22**, 356-360,  
1023 doi:10.1038/11926 (1999).
- 1024 47 Takahashi, K. & Yamanaka, S. Induction of pluripotent stem cells from mouse  
1025 embryonic and adult fibroblast cultures by defined factors. *Cell* **126**, 663-676,  
1026 doi:10.1016/j.cell.2006.07.024 (2006).
- 1027 48 Mastromina, I., Verrier, L., Silva, J. C., Storey, K. G. & Dale, J. K. Myc activity is  
1028 required for maintenance of the neuromesodermal progenitor signalling network and  
1029 for segmentation clock gene oscillations in mouse. *Development* **145**, dev161091  
1030 (2018).
- 1031 49 Beaster-Jones, L., Horton, A. C., Gibson-Brown, J. J., Holland, N. D. & Holland, L.  
1032 Z. The amphioxus T-box gene, *AmphiTbx15/18/22*, illuminates the origins of  
1033 chordate segmentation. *Evolution & development* **8**, 119-129 (2006).
- 1034 50 Horton, A. C. & Gibson-Brown, J. J. Evolution of developmental functions by the  
1035 *Eomesodermin*, *Tbrain1*, *Tbx21* subfamily of T-box genes: insights from  
1036 amphioxus. *Journal of Experimental Zoology* **294**, 112-121 (2002).
- 1037 51 Holland, P. W., Koschorz, B., Holland, L. Z. & Herrmann, B. G. Conservation of  
1038 *Brachyury* (T) genes in amphioxus and vertebrates: developmental and evolutionary  
1039 implications. *Development* **121**, 4283-4291 (1995).
- 1040 52 Aase-Remedios, M. E., Coll-Lladó, C. & Ferrier, D. E. More than one-to-four via 2R:  
1041 evidence of an independent amphioxus expansion and two-gene ancestral vertebrate  
1042 state for MyoD-related myogenic regulatory factors (MRFs). *Molecular Biology and*  
1043 *Evolution* **37**, 2966-2982 (2020).



- 1044 53 Hernández-Hernández, J. M., García-González, E. G., Brun, C. E. & Rudnicki, M. A.  
1045 in *Seminars in cell & developmental biology*. 10-18 (Elsevier).
- 1046 54 Bertrand, S. *et al.* Amphioxus FGF signaling predicts the acquisition of vertebrate  
1047 morphological traits. *Proc Natl Acad Sci U S A* **108**, 9160-9165,  
1048 doi:10.1073/pnas.1014235108 (2011).
- 1049 55 Somorjai, I. M. L. *et al.* Wnt evolution and function shuffling in liberal and  
1050 conservative chordate genomes. *Genome Biol* **19**, 98, doi:10.1186/s13059-018-1468-3  
1051 (2018).
- 1052 56 Neidert, A. H., Panopoulou, G. & Langeland, J. A. Amphioxus goosecoid and the  
1053 evolution of the head organizer and prechordal plate. *Evol Dev* **2**, 303-310,  
1054 doi:10.1046/j.1525-142x.2000.00073.x (2000).
- 1055 57 Panopoulou, G. D., Clark, M. D., Holland, L. Z., Lehrach, H. & Holland, N. D.  
1056 AmphiBMP2/4, an amphioxus bone morphogenetic protein closely related to  
1057 Drosophila decapentaplegic and vertebrate BMP2 and BMP4: insights into evolution  
1058 of dorsoventral axis specification. *Dev Dyn* **213**, 130-139 (1998).
- 1059 58 Venkatesh, T. V., Holland, N. D., Holland, L. Z., Su, M. T. & Bodmer, R. Sequence  
1060 and developmental expression of amphioxus AmphiNk2-1: insights into the  
1061 evolutionary origin of the vertebrate thyroid gland and forebrain. *Dev Genes Evol* **209**,  
1062 254-259, doi:10.1007/s004270050250 (1999).
- 1063 59 Yu, J. K. *et al.* Axial patterning in cephalochordates and the evolution of the  
1064 organizer. *Nature* **445**, 613-617 (2007).
- 1065 60 Pascual-Anaya, J. *et al.* Broken colinearity of the amphioxus Hox cluster. *EvoDevo* **3**,  
1066 1-12 (2012).
- 1067 61 Holland, L. Z., Schubert, M., Kozmik, Z. & Holland, N. D. AmphiPax3/7, an  
1068 amphioxus paired box gene: insights into chordate myogenesis, neurogenesis, and the  
1069 possible evolutionary precursor of definitive vertebrate neural crest. *Evolution &*  
1070 *development* **1**, 153-165 (1999).
- 1071 62 Langeland, J. A., Tomsa, J. M., Jackman, W. R., Jr. & Kimmel, C. B. An amphioxus  
1072 snail gene: expression in paraxial mesoderm and neural plate suggests a conserved  
1073 role in patterning the chordate embryo. *Dev Genes Evol* **208**, 569-577,  
1074 doi:10.1007/s004270050216 (1998).
- 1075 63 Sharman, A., Shimeld, S. M. & Holland, P. An amphioxus Msx gene expressed  
1076 predominantly in the dorsal neural tube. *Development genes and evolution* **209**, 260-  
1077 263 (1999).
- 1078 64 Le Petillon, Y., Oulion, S., Escande, M.-L., Escriva, H. & Bertrand, S. Identification  
1079 and expression analysis of BMP signaling inhibitors genes of the DAN family in  
1080 amphioxus. *Gene Expression Patterns* **13**, 377-383 (2013).
- 1081 65 Jackman, W. R., Langeland, J. A. & Kimmel, C. B. islet reveals segmentation in the  
1082 Amphioxus hindbrain homolog. *Developmental biology* **220**, 16-26 (2000).
- 1083 66 Holland, L. Z., Schubert, M., Holland, N. D. & Neuman, T. Evolutionary conservation  
1084 of the presumptive neural plate markers AmphiSox1/2/3 and AmphiNeurogenin in the  
1085 invertebrate chordate amphioxus. *Dev Biol* **226**, 18-33 (2000).
- 1086 67 Venkatesh, T. V., Holland, N. D., Holland, L. Z., Su, M.-T. & Bodmer, R. Sequence  
1087 and developmental expression of amphioxus AmphiNk2-1: insights into the  
1088 evolutionary origin of the vertebrate thyroid gland and forebrain. *Development genes*  
1089 *and evolution* **209**, 254-259 (1999).
- 1090 68 Kong, W., Yang, Y., Zhang, T., Shi, D. L. & Zhang, Y. Characterization of s FRP  
1091 2□like in amphioxus: insights into the evolutionary conservation of W nt antagonizing  
1092 function. *Evolution & development* **14**, 168-177 (2012).

- 1093 69 Takahashi, T. & Holland, P. W. Amphioxus and ascidian Dmbx homeobox genes give  
1094 clues to the vertebrate origins of midbrain development. (2004).
- 1095 70 Holland, N. D., Holland, L. Z. & Kozmik, Z. An amphioxus Pax gene, AmphiPax-1,  
1096 expressed in embryonic endoderm, but not in mesoderm: implications for the  
1097 evolution of class I paired box genes. *Molecular marine biology and biotechnology* **4**,  
1098 206-214 (1995).
- 1099 71 Mahadevan, N. R., Horton, A. C. & Gibson-Brown, J. J. Developmental expression of  
1100 the amphioxus Tbx1/10 gene illuminates the evolution of vertebrate branchial arches  
1101 and sclerotome. *Development genes and evolution* **214**, 559-566 (2004).
- 1102 72 Boorman, C. J. & Shimeld, S. M. Pitx homeobox genes in Ciona and amphioxus show  
1103 left-right asymmetry is a conserved chordate character and define the ascidian  
1104 adenohypophysis. *Evolution & development* **4**, 354-365 (2002).
- 1105 73 Cattell, M. V., Garnett, A. T., Klymkowsky, M. W. & Medeiros, D. M. A maternally  
1106 established SoxB1/SoxF axis is a conserved feature of chordate germ layer patterning.  
1107 *Evol Dev* **14**, 104-115 (2012).
- 1108 74 Kaltenbach, S. L., Holland, L. Z., Holland, N. D. & Koop, D. Developmental  
1109 expression of the three iroquois genes of amphioxus (BflrxA, BflrxB, and BflrxC)  
1110 with special attention to the gastrula organizer and anteroposterior boundaries in the  
1111 central nervous system. *Gene Expression Patterns* **9**, 329-334 (2009).
- 1112 75 Holland, L. Z., Venkatesh, T. V., Gorlin, A., Bodmer, R. & Holland, N.  
1113 Characterization and developmental expression of AmphiNk2-2, an NK2 class  
1114 homeobox gene from amphioxus (Phylum Chordata; Subphylum Cephalochordata).  
1115 *Development genes and evolution* **208**, 100 (1998).
- 1116 76 Pascual-Anaya, J. *et al.* The evolutionary origins of chordate hematopoiesis and  
1117 vertebrate endothelia. *Dev Biol* **375**, 182-192, doi:10.1016/j.ydbio.2012.11.015  
1118 (2013).
- 1119 77 Gostling, N. J. & Shimeld, S. M. Protochordate Zic genes define primitive somite  
1120 compartments and highlight molecular changes underlying neural crest evolution. *Evol*  
1121 *Dev* **5**, 136-144, doi:10.1046/j.1525-142x.2003.03020.x (2003).
- 1122 78 Kozmik, Z. *et al.* Pax-Six-Eya-Dach network during amphioxus development:  
1123 conservation in vitro but context specificity in vivo. *Dev Biol* **306**, 143-159,  
1124 doi:10.1016/j.ydbio.2007.03.009 (2007).
- 1125 79 Andrews, T. G. R., Pönisch, W., Paluch, E. K., Steventon, B. J. & Benito-Gutierrez, E.  
1126 Single-cell morphometrics reveals ancestral principles of notochord development.  
1127 *Development* **148**, doi:10.1242/dev.199430 (2021).
- 1128 80 Holland, L. Z., Pace, D. A., Blink, M. L., Kene, M. & Holland, N. D. Sequence and  
1129 Expression of Amphioxus Alkali Myosin Light Chain (AmphiMLC-alk) Throughout  
1130 Development: Implications for Vertebrate Myogenesis. *Developmental Biology* **171**,  
1131 665-676, doi:<https://doi.org/10.1006/dbio.1995.1313> (1995).
- 1132 81 Zhang, Y., Wang, L., Shao, M. & Zhang, H. Characterization and developmental  
1133 expression of AmphiMef2 gene in amphioxus. *Science in China Series C: Life*  
1134 *Sciences* **50**, 637-641 (2007).
- 1135 82 Kozmik, Z. *et al.* Characterization of Amphioxus AmphiVent, an evolutionarily  
1136 conserved marker for chordate ventral mesoderm. *Genesis* **29**, 172-179,  
1137 doi:10.1002/gene.1021 (2001).
- 1138 83 Kozmikova, I., Candiani, S., Fabian, P., Gurska, D. & Kozmik, Z. Essential role of  
1139 Bmp signaling and its positive feedback loop in the early cell fate evolution of  
1140 chordates. *Dev Biol* **382**, 538-554 (2013).
- 1141 84 Li, X. *et al.* Expression of a novel somite-formation-related gene, AmphiSom, during  
1142 amphioxus development. *Development genes and evolution* **216**, 52-55 (2006).

- 1143 85 Xiong, J.-W. Molecular and developmental biology of the hemangioblast.  
1144 *Developmental Dynamics* **237**, 1218-1231, doi:<https://doi.org/10.1002/dvdy.21542>  
1145 (2008).
- 1146 86 Moncaut, N. *et al.* Musculin and TCF21 coordinate the maintenance of myogenic  
1147 regulatory factor expression levels during mouse craniofacial development.  
1148 *Development* **139**, 958-967 (2012).
- 1149 87 Mundhada, A., Kulkarni, U., Swami, V., Deshmukh, S. & Patil, A. Craniofacial  
1150 Muscles-differentiation and Morphogenesis. *Annual Research & Review in Biology*, 1-  
1151 9 (2016).
- 1152 88 Schubert, F. R., Singh, A. J., Afoyalan, O., Kioussi, C. & Dietrich, S. To roll the eyes  
1153 and snap a bite – function, development and evolution of craniofacial muscles.  
1154 *Seminars in Cell & Developmental Biology* **91**, 31-44,  
1155 doi:<https://doi.org/10.1016/j.semcdb.2017.12.013> (2019).
- 1156 89 Thisse, B. a. T., C. . Fast Release Clones: A High Throughput Expression Analysis.  
1157 *ZFIN* ([zfinhttp://zfin.org](http://zfin.org)) (2004).
- 1158 90 Topczewska, J. M., Topczewski, J., Solnica-Krezel, L. & Hogan, B. L. Sequence and  
1159 expression of zebrafish foxc1a and foxc1b, encoding conserved forkhead/winged helix  
1160 transcription factors. *Mechanisms of development* **100**, 343-347 (2001).
- 1161 91 Wang, H., Holland, P. W. H. & Takahashi, T. Gene profiling of head mesoderm in  
1162 early zebrafish development: insights into the evolution of cranial mesoderm.  
1163 *EvoDevo* **10**, 14, doi:10.1186/s13227-019-0128-3 (2019).
- 1164 92 Hernández-Vega, A. & Minguillón, C. The Prx1 limb enhancers: targeted gene  
1165 expression in developing zebrafish pectoral fins. *Developmental dynamics* **240**, 1977-  
1166 1988 (2011).
- 1167 93 Tzahor, E. Heart and craniofacial muscle development: A new developmental theme  
1168 of distinct myogenic fields. *Developmental Biology* **327**, 273-279,  
1169 doi:<https://doi.org/10.1016/j.ydbio.2008.12.035> (2009).
- 1170 94 Li, G. *et al.* Cerberus-Nodal-Lefty-Pitx signaling cascade controls left-right  
1171 asymmetry in amphioxus. *Proc Natl Acad Sci U S A* **114**, 3684-3689,  
1172 doi:10.1073/pnas.1620519114 (2017).
- 1173 95 Yeo, G. H. *et al.* Phylogenetic and evolutionary relationships and developmental  
1174 expression patterns of the zebrafish twist gene family. *Development genes and  
1175 evolution* **219**, 289-300 (2009).
- 1176 96 Essner, J. J., Branford, W. W., Zhang, J. & Yost, H. J. Mesendoderm and left-right  
1177 brain, heart and gut development are differentially regulated by pitx2 isoforms.  
1178 *Development* **127**, 1081-1093, doi:10.1242/dev.127.5.1081 (2000).
- 1179 97 Faucourt, M., Houliston, E., Besnardeau, L., Kimelman, D. & Lepage, T. The Pitx2  
1180 Homeobox Protein Is Required Early for Endoderm Formation and Nodal Signaling.  
1181 *Developmental Biology* **229**, 287-306, doi:<https://doi.org/10.1006/dbio.2000.9950>  
1182 (2001).
- 1183 98 John, L. B., Trengove, M. C., Fraser, F. W., Yoong, S. H. & Ward, A. C. Pegasus, the  
1184 ‘atypical’ Ikaros family member, influences left–right asymmetry and regulates pitx2  
1185 expression. *Developmental Biology* **377**, 46-54,  
1186 doi:<https://doi.org/10.1016/j.ydbio.2013.02.017> (2013).
- 1187 99 Ruvinsky, I., Silver, L. M. & Ho, R. K. Characterization of the zebrafish tbx16 gene  
1188 and evolution of the vertebrate T-box family. *Development genes and evolution* **208**,  
1189 94-99 (1998).
- 1190 100 Strähle, U., Blader, P., Henrique, D. & Ingham, P. Axial, a zebrafish gene expressed  
1191 along the developing body axis, shows altered expression in cyclops mutant embryos.  
1192 *Genes & Development* **7**, 1436-1446 (1993).

- 1193 101 Germain, S., Howell, M., Esslemont, G. M. & Hill, C. S. Homeodomain and winged-helix transcription factors recruit activated Smads to distinct promoter elements via a  
1194 common Smad interaction motif. *Genes & Development* **14**, 435-451 (2000).  
1195
- 1196 102 Rebagliati, M. R., Toyama, R., Fricke, C., Haffter, P. & Dawid, I. B. Zebrafish nodal-related genes are implicated in axial patterning and establishing left–right asymmetry.  
1197 *Developmental biology* **199**, 261-272 (1998).  
1198
- 1199 103 Dobin, A. *et al.* STAR: ultrafast universal RNA-seq aligner. *Bioinformatics* **29**, 15-21,  
1200 doi:10.1093/bioinformatics/bts635 (2012).
- 1201 104 Gu, Z., Eils, R. & Schlesner, M. Complex heatmaps reveal patterns and correlations in  
1202 multidimensional genomic data. *Bioinformatics* **32**, 2847-2849 (2016).
- 1203 105 Magri, M. S. *et al.* Assaying Chromatin Accessibility Using ATAC-Seq in  
1204 Invertebrate Chordate Embryos. *Front Cell Dev Biol* **7**, 372,  
1205 doi:10.3389/fcell.2019.00372 (2019).
- 1206 106 Li, H. & Durbin, R. Fast and accurate short read alignment with Burrows–Wheeler  
1207 transform. *Bioinformatics* **25**, 1754-1760, doi:10.1093/bioinformatics/btp324 (2009).
- 1208 107 Ramírez, F. *et al.* deepTools2: a next generation web server for deep-sequencing data  
1209 analysis. *Nucleic Acids Research* **44**, W160-W165, doi:10.1093/nar/gkw257 (2016).
- 1210 108 Tischler, G. & Leonard, S. biobambam: tools for read pair collation based algorithms  
1211 on BAM files. *Source Code for Biology and Medicine* **9**, 13, doi:10.1186/1751-0473-  
1212 9-13 (2014).
- 1213 109 Zhang, Y. *et al.* Model-based Analysis of ChIP-Seq (MACS). *Genome Biology* **9**,  
1214 R137, doi:10.1186/gb-2008-9-9-r137 (2008).
- 1215 110 Lawrence, M. *et al.* Software for computing and annotating genomic ranges. *PLoS  
1216 computational biology* **9**, e1003118 (2013).
- 1217 111 Heinz, S. *et al.* Simple combinations of lineage-determining transcription factors  
1218 prime cis-regulatory elements required for macrophage and B cell identities. *Mol Cell*  
1219 **38**, 576-589, doi:10.1016/j.molcel.2010.05.004 (2010).
- 1220 112 Weirauch, M. T. *et al.* Determination and inference of eukaryotic transcription factor  
1221 sequence specificity. *Cell* **158**, 1431-1443 (2014).
- 1222 113 Machlab, D. *et al.* monaLisa: an R/Bioconductor package for identifying regulatory  
1223 motifs. *Bioinformatics* **38**, 2624-2625 (2022).
- 1224 114 Tarashansky, A. J. *et al.* Mapping single-cell atlases throughout Metazoa unravels cell  
1225 type evolution. *eLife* **10**, e66747, doi:10.7554/eLife.66747 (2021).
- 1226 115 Wolf, F. A., Angerer, P. & Theis, F. J. SCANPY: large-scale single-cell gene  
1227 expression data analysis. *Genome Biology* **19**, 15, doi:10.1186/s13059-017-1382-0  
1228 (2018).
- 1229 116 Derelle, R., Philippe, H. & Colbourne, J. K. Broccoli: Combining Phylogenetic and  
1230 Network Analyses for Orthology Assignment. *Molecular Biology and Evolution* **37**,  
1231 3389-3396, doi:10.1093/molbev/msaa159 (2020).
- 1232 117 Mistry, J., Finn, R. D., Eddy, S. R., Bateman, A. & Punta, M. Challenges in homology  
1233 search: HMMER3 and convergent evolution of coiled-coil regions. *Nucleic Acids  
1234 Research* **41**, e121-e121, doi:10.1093/nar/gkt263 (2013).
- 1235 118 Punta, M. *et al.* The Pfam protein families database. *Nucleic acids research* **40**, D290-  
1236 D301 (2012).
- 1237 119 Buchfink, B., Reuter, K. & Drost, H.-G. Sensitive protein alignments at tree-of-life  
1238 scale using DIAMOND. *Nature Methods* **18**, 366-368, doi:10.1038/s41592-021-  
1239 01101-x (2021).
- 1240 120 Enright, A. J., Van Dongen, S. & Ouzounis, C. A. An efficient algorithm for large-  
1241 scale detection of protein families. *Nucleic acids research* **30**, 1575-1584 (2002).

- 1242 121 Katoh, K. & Standley, D. M. MAFFT Multiple Sequence Alignment Software Version  
1243 7: Improvements in Performance and Usability. *Molecular Biology and Evolution* **30**,  
1244 772-780, doi:10.1093/molbev/mst010 (2013).
- 1245 122 Steenwyk, J. L., Buida III, T. J., Li, Y., Shen, X.-X. & Rokas, A. ClipKIT: a multiple  
1246 sequence alignment trimming software for accurate phylogenomic inference. *PLoS*  
1247 *biology* **18**, e3001007 (2020).
- 1248 123 Minh, B. Q. *et al.* IQ-TREE 2: New Models and Efficient Methods for Phylogenetic  
1249 Inference in the Genomic Era. *Molecular Biology and Evolution* **37**, 1530-1534,  
1250 doi:10.1093/molbev/msaa015 (2020).
- 1251 124 Kalyaanamoorthy, S., Minh, B. Q., Wong, T. K. F., von Haeseler, A. & Jermin, L. S.  
1252 ModelFinder: fast model selection for accurate phylogenetic estimates. *Nature*  
1253 *Methods* **14**, 587-589, doi:10.1038/nmeth.4285 (2017).
- 1254 125 Grau-Bové, X. & Sebé-Pedrós, A. Orthology Clusters from Gene Trees with Possvm.  
1255 *Molecular Biology and Evolution* **38**, 5204-5208, doi:10.1093/molbev/msab234  
1256 (2021).
- 1257 126 Larkin, M. A. *et al.* Clustal W and Clustal X version 2.0. *bioinformatics* **23**, 2947-  
1258 2948 (2007).
- 1259 127 Gouy, M., Guindon, S. & Gascuel, O. SeaView version 4: a multiplatform graphical  
1260 user interface for sequence alignment and phylogenetic tree building. *Molecular*  
1261 *biology and evolution* **27**, 221-224 (2010).
- 1262 128 Gehrke, A. R. *et al.* Deep conservation of wrist and digit enhancers in fish.  
1263 *Proceedings of the National Academy of Sciences* **112**, 803-808,  
1264 doi:10.1073/pnas.1420208112 (2015).
- 1265 129 Kawakami, K. Tol2: a versatile gene transfer vector in vertebrates. *Genome Biology* **8**,  
1266 S7, doi:10.1186/gb-2007-8-s1-s7 (2007).
- 1267
- 1268

## 1269 **Acknowledgements**

1270 This work benefited from access to the Observatoire Océanologique de Banyuls-sur-Mer, an  
1271 EMBRC-France and EMBRC-ERIC site. Embryo imaging experiments were undertaken  
1272 using the material of the BIOPIC platform. The laboratory of H.E. and S.B. was supported by  
1273 the CNRS, and by the “Agence Nationale de la Recherche” under the grants ANR-19-CE13-  
1274 0011 and ANR-21-CE13-0034. Research in A.S-P. group was supported by the European  
1275 Research Council (ERC-StG 851647) and the Spanish Ministry of Science and Innovation  
1276 (PID2021-124757NB-I00). X.G-B. is supported by the European Union’s H2020 research and  
1277 innovation program under Marie Skłodowska-Curie grant agreement 101031767. A.E. is  
1278 supported by FPI PhD fellowships from the Spanish Ministry of Science and Innovation.  
1279 J.J.T. was supported by the Spanish Ministerio de Economía y Competitividad (grant  
1280 PID2019-103921GB-I00). M.I. laboratory research has been funded by the European  
1281 Research Council (ERC) under the European Union's Horizon 2020 research and innovation  
1282 program (ERCCoG-LS2-101002275 to MI), by the Spanish Ministry of Economy and  
1283 Competitiveness (PID2020-115040GB-I00 to MI) and by the ‘Centro de Excelencia Severo  
1284 Ochoa 2013-2017’(SEV-2012-0208).

1285

1286

## 1287 **Author contributions**

1288 Conceptualization of this study was done by J.L. G-Z., M.I., S.B., A.S.P. and H.E.; the study  
1289 was carried out by X.G.B., L.S., L.M., A.S, A.N., O.F., M.I., S. B., A.S.P. and H.E.; writing  
1290 of the original draft was done by X.G.B., S.B., A.S.P. and H.E.; funding was acquired by  
1291 A.S.B., J.T., M.I., S.B., A.S.P. and H.E.; this study was supervised by J.L. G-Z , J.T., M.I.,  
1292 S.B., A.S.P. and H.E.

1293

## 1294 **Competing interests**

1295 The authors declare no competing financial interests.

**Figure 1**

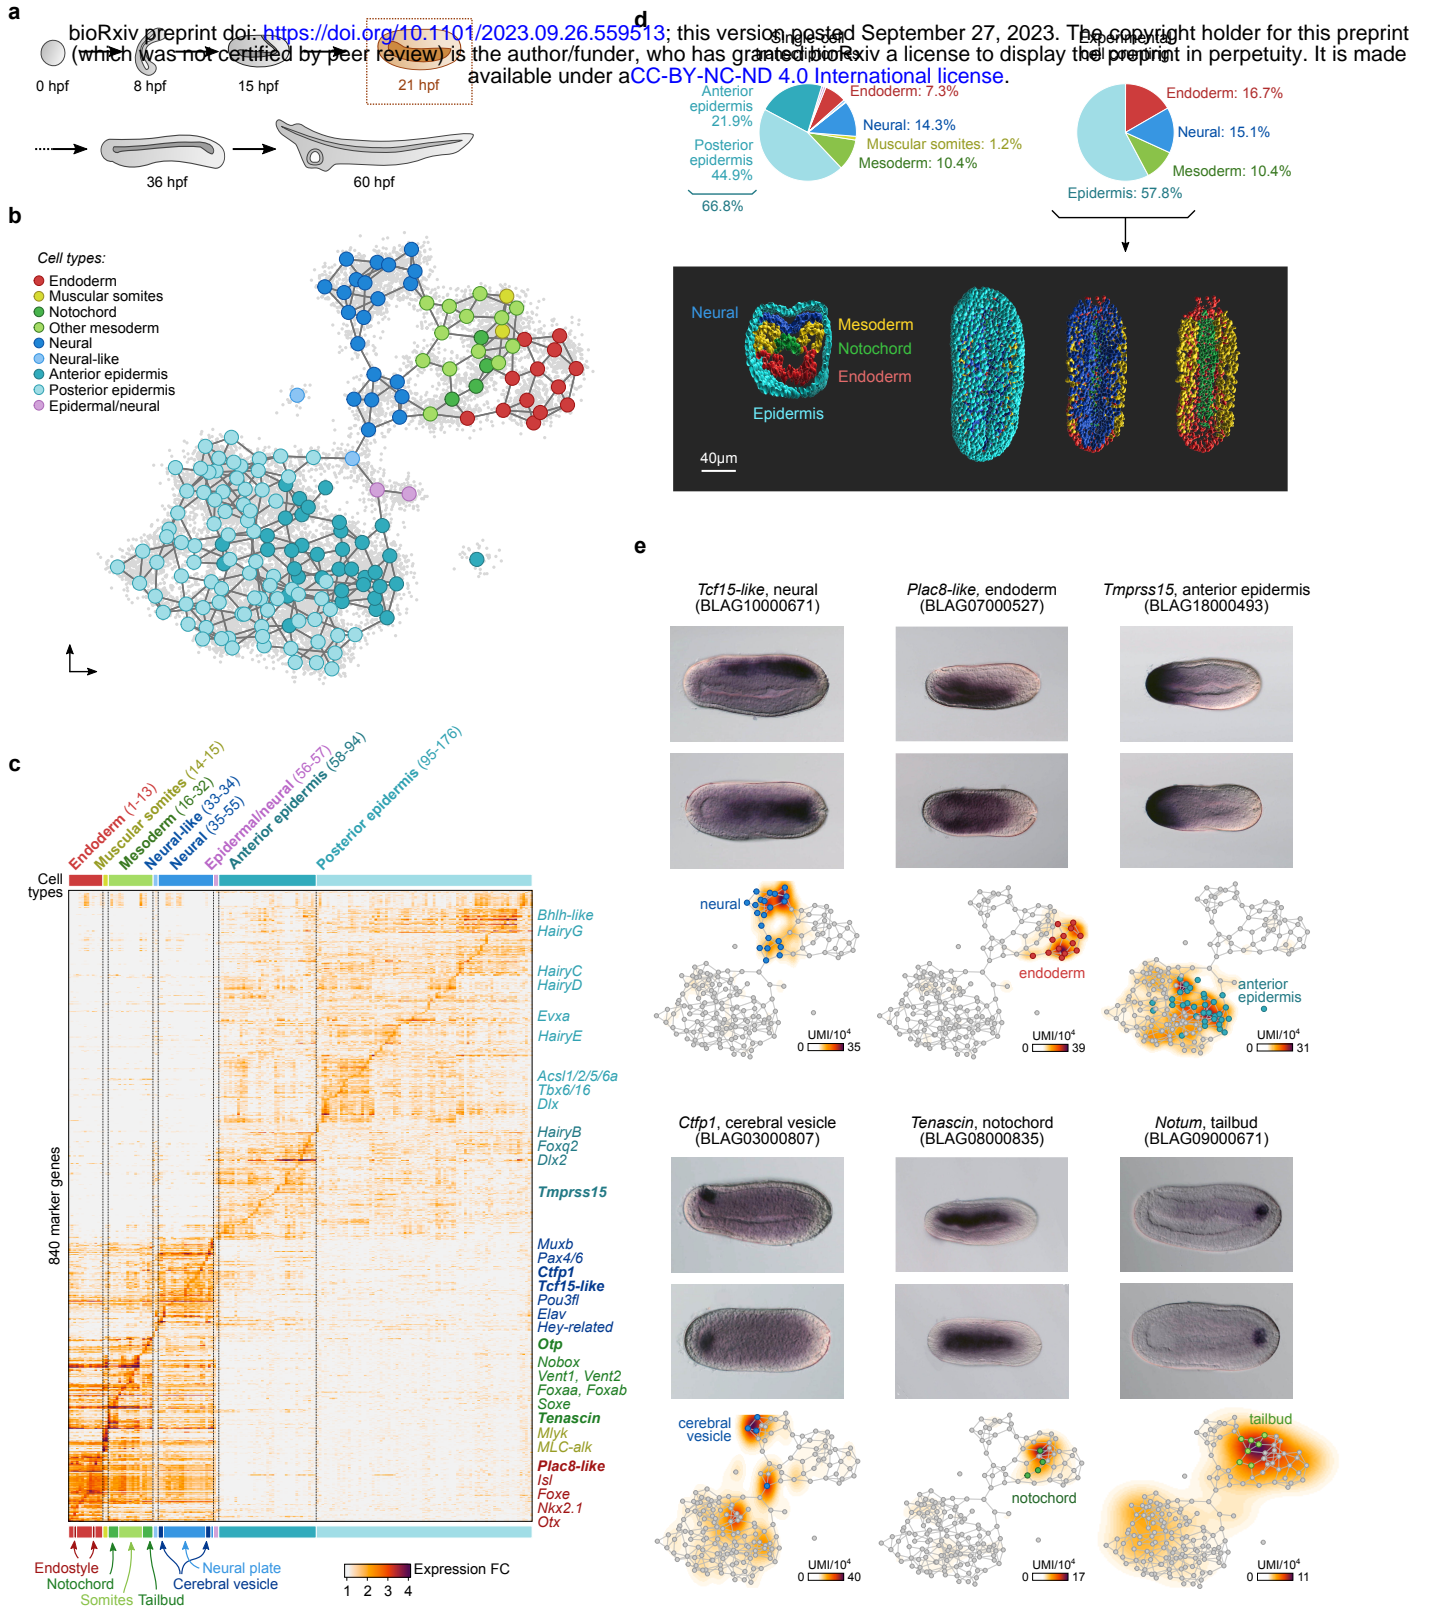

**Figure 2**

**a** bioRxiv preprint doi: <https://doi.org/10.1101/2023.09.26.559513>; this version posted September 27, 2023. The copyright holder for this preprint (which was not certified by peer review) is the author/funder, who has granted bioRxiv a license to display the preprint in perpetuity. It is made available under aCC-BY-NC-ND 4.0 International license.

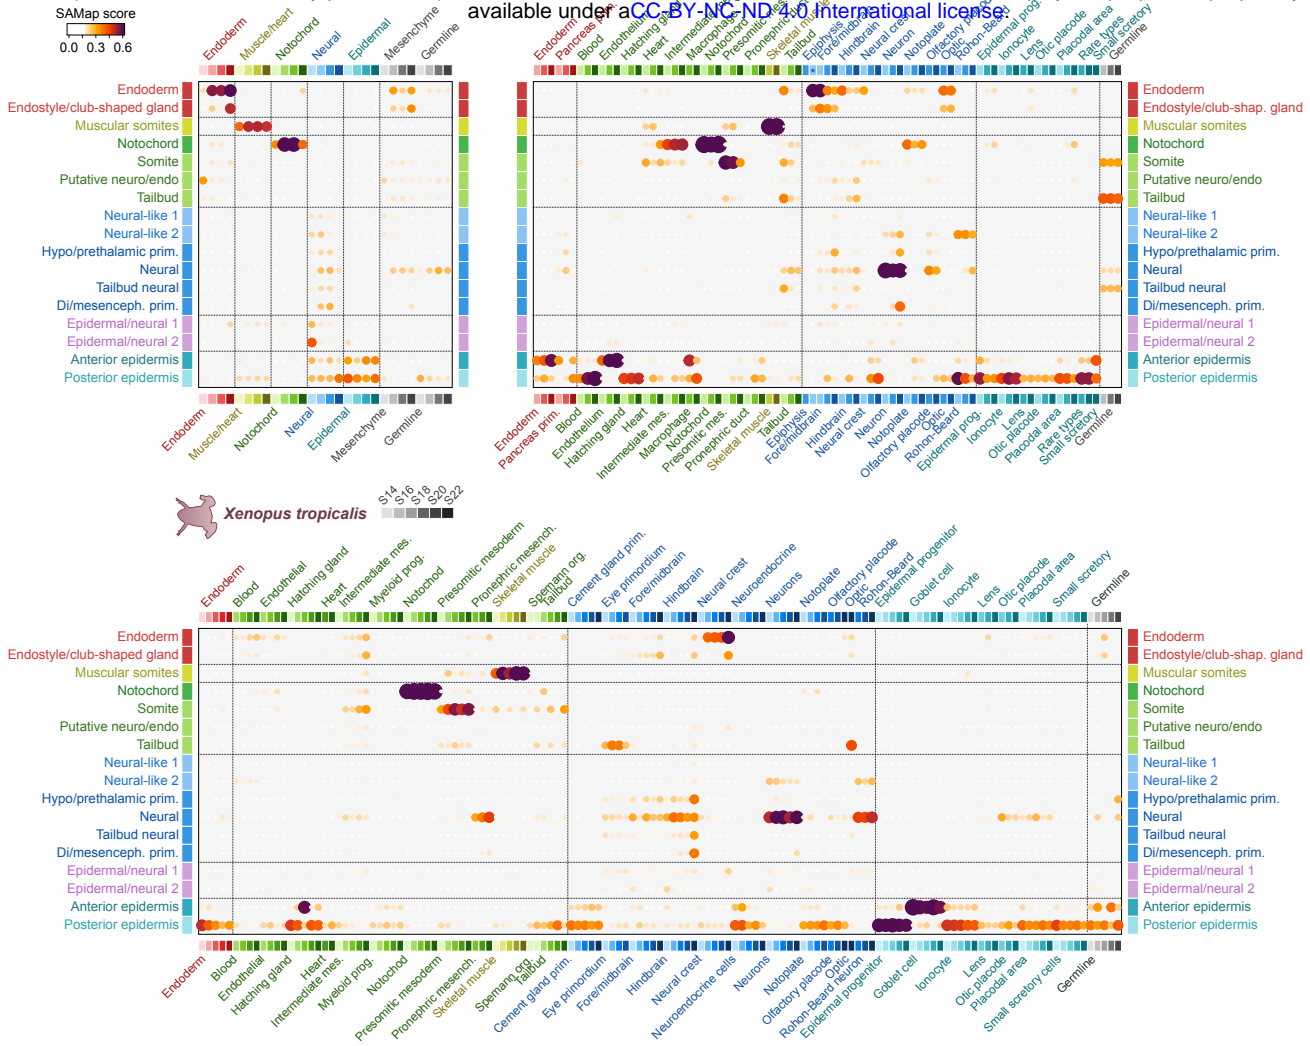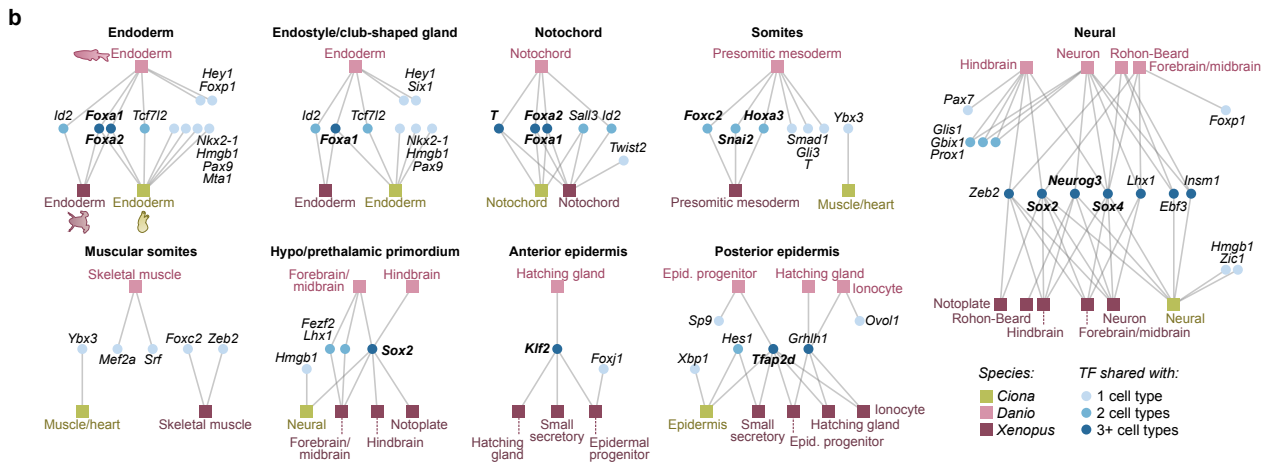



**Figure 3**

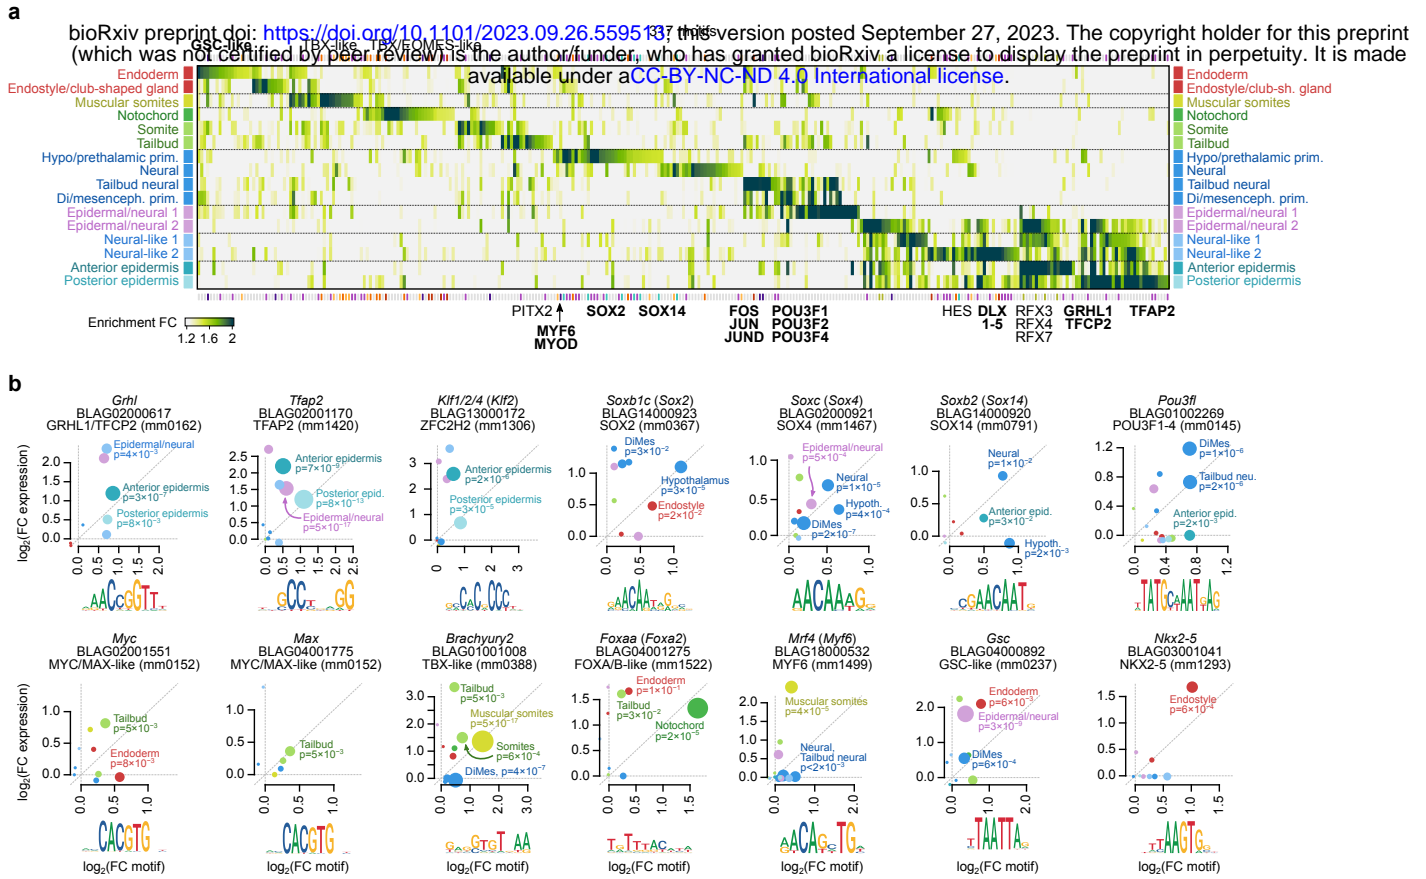

**Figure 4**

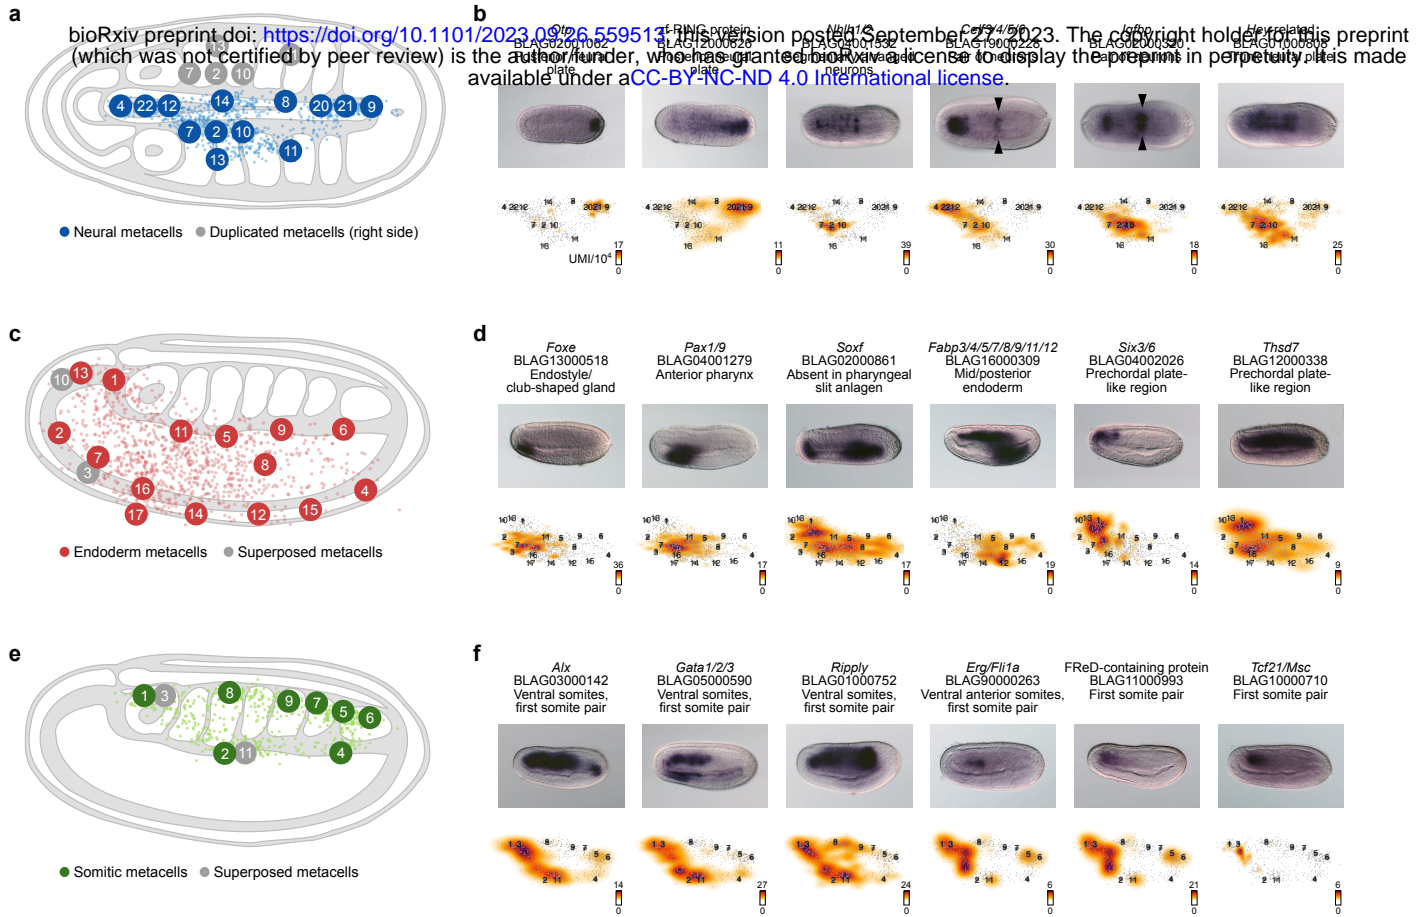

**Figure 5**

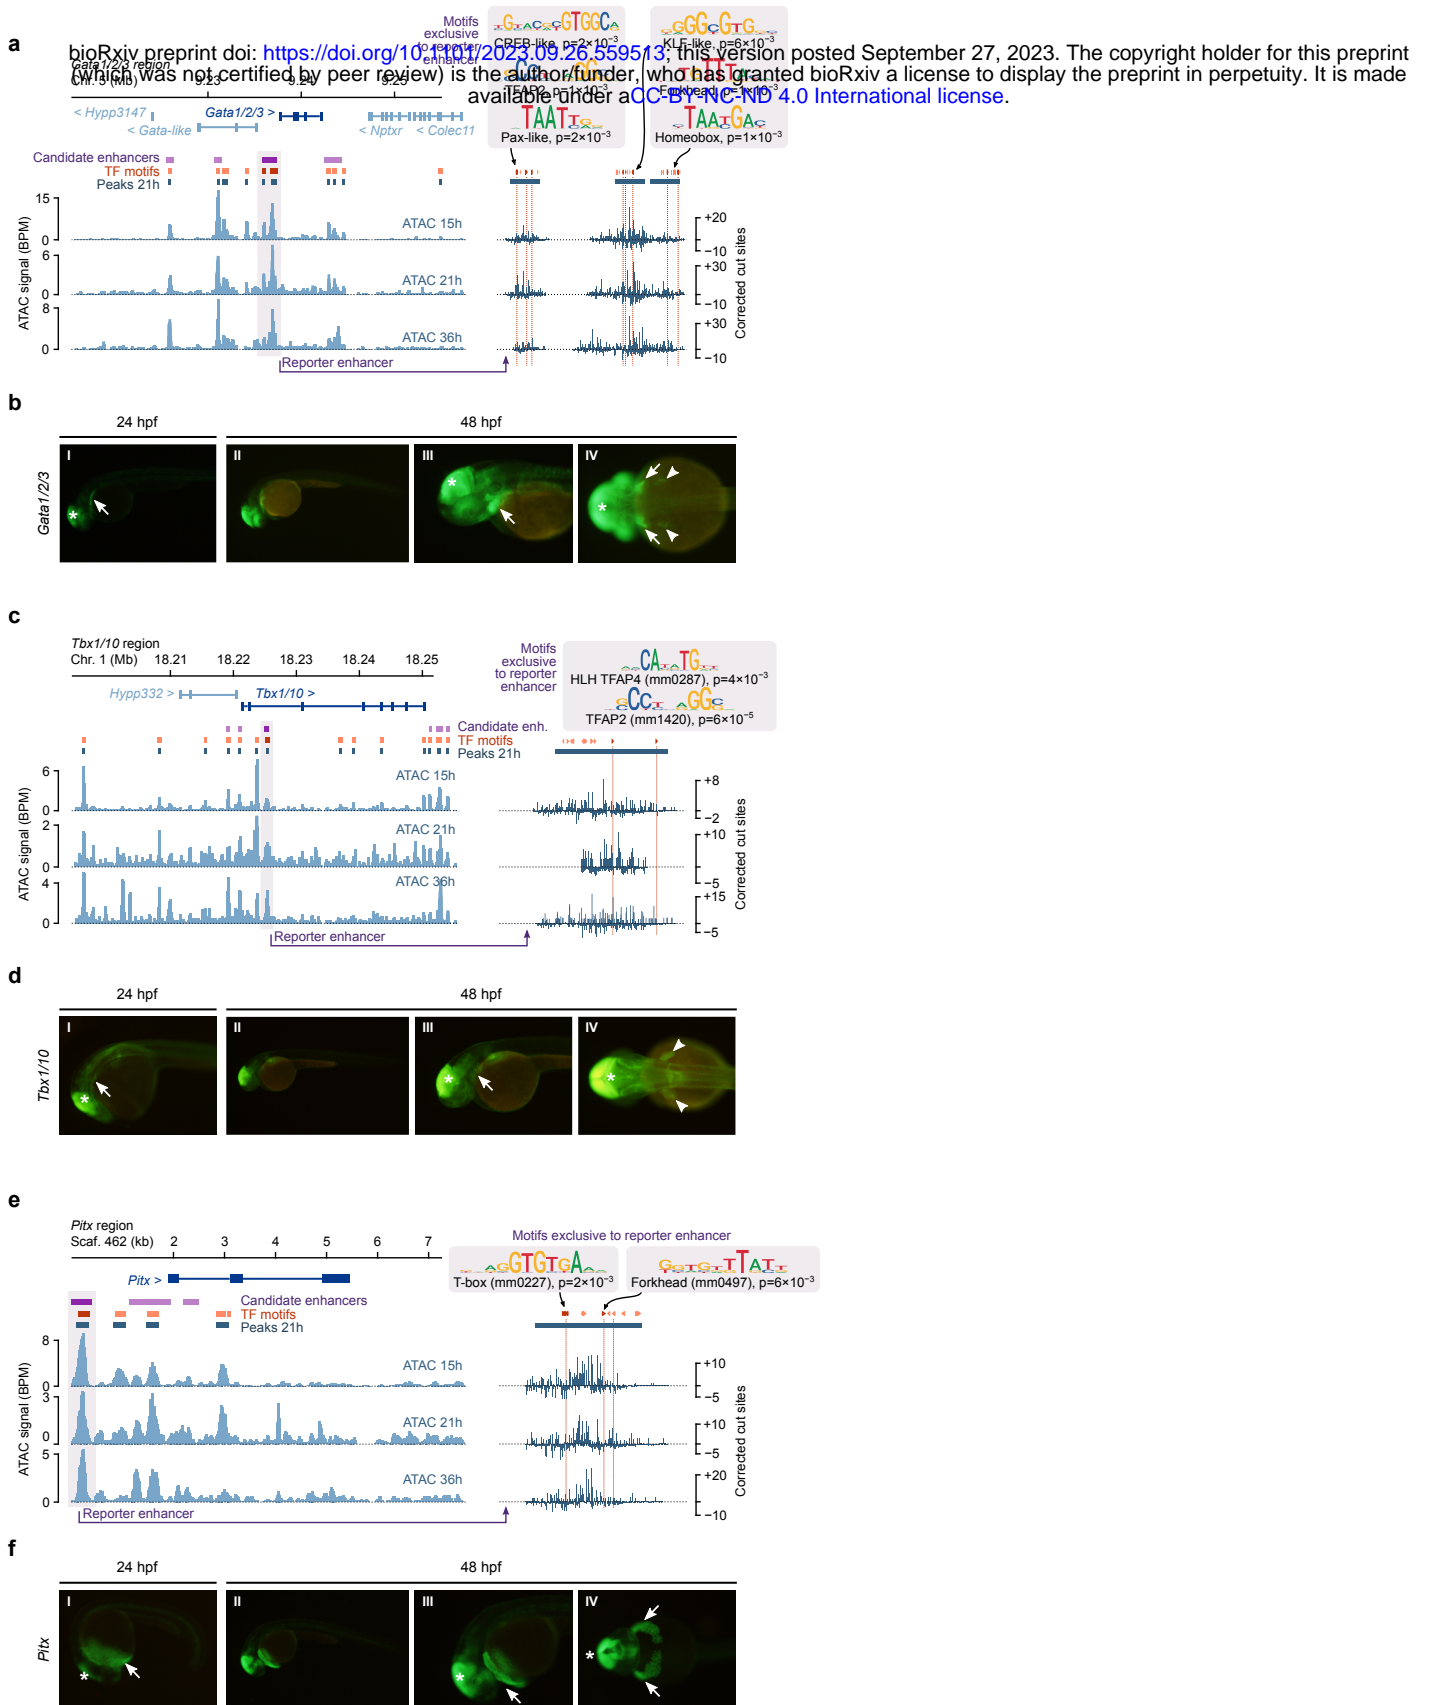

**Figure 6**

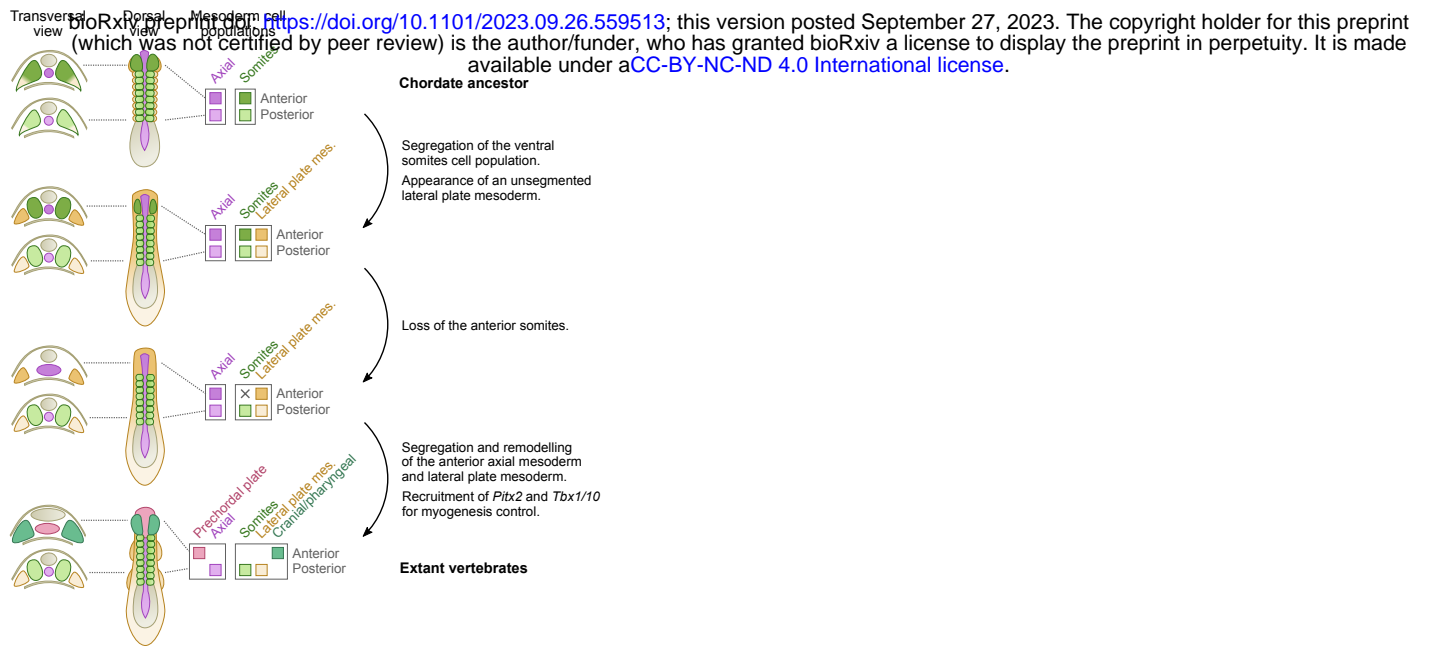

Source: https://www.biorxiv.org/content/biorxiv/early/2023/09/27/2023.09.26.559513.full.pdf
